# Supplementary material for: Binuclear hexafluorocyclopentadiene iron carbonyls: bis(dihapto) versus trihapto–monohapto bonding in iron–iron bonded structures
Source: Royal Society of Chemistry journal article supplement (doi:10.1039/c3nj00311f), 2013-01-01
Supplement: c3nj00311f.pdf [file c3nj00311f.pdf]

# Binuclear Hexafluorocyclopentadiene Iron Carbonyls: Bis(dihapto) Versus Trihapto-monohapto Bonding in Iron-Iron Bonded Structures

Jianming Deng,<sup>a</sup> Qian-shu Li,<sup>\*a,b</sup> Yaoming Xie,<sup>c</sup> R. Bruce King,<sup>\*a,c</sup> and  
H. F. Schaefer, III<sup>c</sup>

<sup>a</sup>MOE Key Laboratory of Theoretical Environmental Chemistry, Center for Computational Quantum Chemistry, South China Normal University, Guangzhou 510631, P. R. China

<sup>b</sup>Institute of Chemical Physics, Beijing Institute of Technology, Beijing 100081, P. R. China

<sup>c</sup>Department of Chemistry and Center for Computational Chemistry, University of Georgia, Athens, Georgia 30602, USA

## Supporting Information

**Tables S1 to S6.** Coordinates of  $(C_5F_6)Fe(CO)_n$  ( $n = 4, 3, 2$ ).

**Tables S7 to S22.** Coordinates of  $(C_5F_6)Fe_2(CO)_n$  ( $n = 8, 7, 6, 5$ ).

**Tables S23 to S28** Harmonic vibrational frequencies ( $cm^{-1}$ ) and IR intensities (km/mol) of  $(C_5F_6)Fe(CO)_n$  ( $n = 4, 3, 2$ ).

**Tables S29 to S44** Harmonic vibrational frequencies ( $cm^{-1}$ ) and IR intensities (km/mol) of  $(C_5F_6)Fe_2(CO)_n$  ( $n = 8, 7, 6, 5$ ).

**Tables S45 to S46** Total energies ( $E$  and  $E_{ZPVE}$ , in Hartree), relative energies with and without ZPVE corrections ( $\Delta E$  and  $\Delta E_{ZPVE}$  in kcal/mol),  $\Delta H$  and  $\Delta G$  (in kcal/mol) at the standard condition, number of imaginary vibrational frequencies ( $N_{imag}$ ), and the LUMO-HOMO gaps (in eV) for mononuclear  $(C_5F_6)Fe(CO)_n$  ( $n = 4, 3, 2$ ) structures.

**Tables S47 to S50** Total energies ( $E$  and  $E_{ZPVE}$ , in Hartree), relative energies with and without ZPVE corrections ( $\Delta E$  and  $\Delta E_{ZPVE}$  in kcal/mol),  $\Delta H$  and  $\Delta G$  (in kcal/mol) at the standard condition, number of imaginary vibrational frequencies ( $N_{imag}$ ), and the LUMO-HOMO gaps (in eV), and Fe-Fe bond distances (in Å) for binuclear  $(C_5F_6)Fe_2(CO)_n$  ( $n = 8, 7, 6, 5$ ) structures.

**Table 51.** The  $\nu(CO)$  frequencies of the mononuclear  $(C_5F_6)Fe(CO)_n$  ( $n = 4, 3, 2$ ) and binuclear  $(C_5F_6)Fe_2(CO)_n$  ( $n = 8, 7, 6, 5$ ) derivatives (with the BP86 method). Infrared intensities are given in parentheses in km/mol.

Complete Gaussian 03 reference (Reference 28)

Table S1 Coordinates of (C<sub>5</sub>F<sub>6</sub>)Fe(CO)<sub>4</sub> **14-1S** (C<sub>1</sub>)

|    | B3LYP/DZP |           |           | BP86/DZP  |           |           |
|----|-----------|-----------|-----------|-----------|-----------|-----------|
| C  | 0.469920  | -0.824981 | -0.668247 | 0.479754  | -0.823560 | -0.697217 |
| C  | 0.335175  | 0.563768  | -1.078900 | 0.348123  | 0.577787  | -1.093753 |
| C  | 1.552339  | 1.265629  | -0.606420 | 1.554637  | 1.284422  | -0.591057 |
| C  | 2.408855  | 0.413347  | -0.019821 | 2.418263  | 0.416572  | -0.004718 |
| Fe | -1.121105 | 0.037591  | 0.263127  | -1.121648 | 0.030014  | 0.257054  |
| C  | -1.796503 | -1.340129 | 1.263958  | -1.785771 | -1.345959 | 1.233960  |
| C  | -2.176135 | -0.509213 | -1.156744 | -2.186059 | -0.492729 | -1.128351 |
| C  | -0.191784 | 0.611696  | 1.741449  | -0.219579 | 0.580091  | 1.732083  |
| C  | -2.150670 | 1.542797  | 0.395511  | -2.126307 | 1.529620  | 0.397672  |
| O  | -2.190828 | -2.231653 | 1.876134  | -2.193325 | -2.248689 | 1.850246  |
| O  | -2.775326 | 2.509213  | 0.449058  | -2.755815 | 2.510368  | 0.464907  |
| O  | -2.889688 | -0.837040 | -1.991198 | -2.935216 | -0.816178 | -1.956114 |
| O  | 0.308768  | 0.992681  | 2.701950  | 0.266994  | 0.955527  | 2.721229  |
| C  | 1.852425  | -0.995338 | -0.005082 | 1.863270  | -0.999509 | -0.014934 |
| F  | 3.502206  | 0.719685  | 0.675545  | 3.502714  | 0.722365  | 0.718569  |
| F  | 1.676827  | 2.588332  | -0.673898 | 1.672380  | 2.617045  | -0.631764 |
| F  | -0.057383 | 0.864828  | -2.354995 | -0.055257 | 0.906858  | -2.364003 |
| F  | 0.202248  | -1.800487 | -1.586413 | 0.215256  | -1.795184 | -1.626821 |
| F  | 2.619713  | -1.872774 | -0.707325 | 2.642774  | -1.871962 | -0.734154 |
| F  | 1.801233  | -1.478298 | 1.277852  | 1.802550  | -1.506786 | 1.268431  |

Table S2 Coordinates of  $(C_5F_6)Fe(CO)_3$  **13-1S** ( $C_s$ )

| B3LYP/DZP |           |           | BP86/DZP  |           |           |           |
|-----------|-----------|-----------|-----------|-----------|-----------|-----------|
| C         | 0.083521  | -0.950067 | 1.119768  | 0.084618  | -0.962763 | 1.126466  |
| C         | 1.367121  | -0.427179 | 0.706231  | 1.368653  | -0.413596 | 0.714167  |
| C         | 1.367121  | -0.427179 | -0.706231 | 1.368653  | -0.413596 | -0.714167 |
| C         | 0.083521  | -0.950067 | -1.119768 | 0.084618  | -0.962763 | -1.126466 |
| C         | -2.012305 | 0.733203  | 0.000000  | -1.993462 | 0.728288  | 0.000000  |
| C         | 0.013430  | 1.984483  | 1.326530  | 0.006023  | 1.983754  | 1.300786  |
| F         | -0.178161 | -1.222307 | -2.408539 | -0.194656 | -1.219764 | -2.418654 |
| F         | 2.376874  | -0.079870 | -1.491404 | 2.391241  | -0.078248 | -1.501787 |
| F         | -0.178161 | -1.222307 | 2.408539  | -0.194656 | -1.219764 | 2.418654  |
| F         | 2.376874  | -0.079870 | 1.491404  | 2.391241  | -0.078248 | 1.501787  |
| C         | -0.404932 | -1.864115 | 0.000000  | -0.405016 | -1.882715 | 0.000000  |
| F         | 0.148039  | -3.125099 | 0.000000  | 0.162860  | -3.150831 | 0.000000  |
| F         | -1.746873 | -2.065914 | 0.000000  | -1.754357 | -2.093145 | 0.000000  |
| O         | -3.163386 | 0.752395  | 0.000000  | -3.159937 | 0.758993  | 0.000000  |
| O         | 0.138651  | 2.747371  | 2.180604  | 0.121418  | 2.777938  | 2.150260  |
| Fe        | -0.198620 | 0.756917  | 0.000000  | -0.192266 | 0.756879  | 0.000000  |
| C         | 0.013430  | 1.984483  | -1.326530 | 0.006023  | 1.983754  | -1.300786 |
| O         | 0.138651  | 2.747371  | -2.180604 | 0.121418  | 2.777938  | -2.150260 |

Table S3 Coordinates of  $(C_5F_6)Fe(CO)_3$  **13-2S** ( $C_1$ )

| B3LYP/DZP |           |           | BP86/DZP  |           |           |           |
|-----------|-----------|-----------|-----------|-----------|-----------|-----------|
| C         | 0.465320  | -0.630171 | -0.816163 | 0.466597  | -0.644448 | -0.798916 |
| C         | 0.292153  | 0.824581  | -0.889713 | 0.302462  | 0.830595  | -0.879247 |
| C         | 1.403131  | 1.409203  | -0.105956 | 1.427882  | 1.413184  | -0.109584 |
| C         | 2.229858  | 0.455898  | 0.355596  | 2.260318  | 0.445762  | 0.353496  |
| C         | -2.146851 | -1.704656 | 0.174610  | -2.179465 | -1.656383 | 0.156885  |
| C         | -0.885579 | 0.106086  | 1.596998  | -0.900266 | 0.110967  | 1.551955  |
| O         | -2.630393 | -2.733189 | 0.352364  | -2.702927 | -2.677303 | 0.370236  |
| O         | -0.631729 | 0.239477  | 2.713768  | -0.666693 | 0.244691  | 2.692367  |
| C         | 1.771463  | -0.924807 | -0.068649 | 1.785601  | -0.940285 | -0.054233 |
| F         | 3.207318  | 0.600419  | 1.247250  | 3.251712  | 0.593202  | 1.239603  |
| F         | 1.453582  | 2.705765  | 0.189075  | 1.493159  | 2.719056  | 0.177120  |
| F         | 0.008419  | 1.403088  | -2.104100 | -0.005189 | 1.409101  | -2.096233 |
| F         | 0.283769  | -1.342216 | -1.974501 | 0.275304  | -1.365552 | -1.957564 |
| F         | 2.664701  | -1.554228 | -0.883370 | 2.671865  | -1.587554 | -0.883975 |
| F         | 1.612621  | -1.734954 | 1.023841  | 1.628773  | -1.747244 | 1.052067  |
| Fe        | -1.292187 | -0.086751 | -0.108246 | -1.292252 | -0.080522 | -0.120998 |
| C         | -2.576675 | 1.241368  | -0.062141 | -2.572676 | 1.220058  | -0.065665 |
| O         | -3.337098 | 2.104921  | -0.038238 | -3.353474 | 2.086086  | -0.007773 |

Table S4 Coordinates of (C<sub>5</sub>F<sub>6</sub>)Fe(CO)<sub>2</sub> **12-1S** (C<sub>s</sub>)

| B3LYP/DZP |           |           | BP86/DZP  |           |           |           |
|-----------|-----------|-----------|-----------|-----------|-----------|-----------|
| C         | -0.021252 | 0.914929  | 1.131113  | 0.042879  | -0.932887 | 1.142273  |
| C         | -1.190409 | 0.205907  | 0.713039  | 1.198647  | -0.186482 | 0.722240  |
| C         | -1.190409 | 0.205907  | -0.713039 | 1.198647  | -0.186482 | -0.722240 |
| C         | -0.021252 | 0.914929  | -1.131113 | 0.042879  | -0.932887 | -1.142273 |
| Fe        | 0.479872  | -0.721564 | 0.000000  | -0.469279 | 0.707181  | 0.000000  |
| C         | 0.595582  | -1.952009 | -1.332191 | -0.611765 | 1.937304  | -1.296197 |
| C         | 0.595582  | -1.952009 | 1.332191  | -0.611765 | 1.937304  | 1.296197  |
| F         | 0.244852  | 1.205018  | -2.415380 | -0.241692 | -1.218396 | -2.427828 |
| F         | -2.145043 | -0.294436 | -1.484691 | 2.164808  | 0.314527  | -1.494267 |
| F         | 0.244852  | 1.205018  | 2.415380  | -0.241692 | -1.218396 | 2.427828  |
| F         | -2.145043 | -0.294436 | 1.484691  | 2.164808  | 0.314527  | 1.494267  |
| C         | 0.460149  | 1.802629  | 0.000000  | -0.456574 | -1.807350 | 0.000000  |
| F         | -0.002684 | 3.096791  | 0.000000  | -0.028758 | -3.125673 | 0.000000  |
| F         | 1.830203  | 1.914764  | 0.000000  | -1.844339 | -1.879648 | 0.000000  |
| O         | 0.619445  | -2.723469 | -2.189919 | -0.648416 | 2.747482  | -2.141771 |
| O         | 0.619445  | -2.723469 | 2.189919  | -0.648416 | 2.747482  | 2.141771  |

Table S5 Coordinates of (C<sub>5</sub>F<sub>6</sub>)Fe(CO)<sub>2</sub> **12-2T** (C<sub>s</sub>)

| B3LYP/DZP |           |           | BP86/DZP  |           |           |           |
|-----------|-----------|-----------|-----------|-----------|-----------|-----------|
| C         | -0.303717 | -0.799785 | 1.146838  | -0.252592 | -0.805673 | 1.141921  |
| C         | -1.300698 | 0.115645  | 0.721147  | -1.313734 | 0.078130  | 0.723214  |
| C         | -1.300698 | 0.115645  | -0.721147 | -1.313734 | 0.078130  | -0.723214 |
| C         | -0.303717 | -0.799785 | -1.146838 | -0.252592 | -0.805673 | -1.141921 |
| Fe        | 0.546330  | 0.795915  | 0.000000  | 0.478784  | 0.796892  | 0.000000  |
| C         | 2.386878  | 0.465566  | 0.000000  | 2.299742  | 0.589220  | 0.000000  |
| C         | 0.192841  | 2.658039  | 0.000000  | 0.137434  | 2.609996  | 0.000000  |
| O         | 3.523825  | 0.292054  | 0.000000  | 3.464744  | 0.506127  | 0.000000  |
| O         | -0.017128 | 3.789310  | 0.000000  | -0.061599 | 3.761800  | 0.000000  |
| C         | -0.037095 | -1.768497 | 0.000000  | 0.035221  | -1.785839 | 0.000000  |
| F         | -0.145165 | -1.175256 | -2.426650 | -0.042338 | -1.140160 | -2.430135 |
| F         | -2.150910 | 0.795192  | -1.486683 | -2.202919 | 0.701315  | -1.504667 |
| F         | -2.150910 | 0.795192  | 1.486683  | -2.202919 | 0.701315  | 1.504667  |
| F         | -0.145165 | -1.175256 | 2.426650  | -0.042338 | -1.140160 | 2.430135  |
| F         | -0.876762 | -2.863698 | 0.000000  | -0.788205 | -2.909283 | 0.000000  |
| F         | 1.217700  | -2.294583 | 0.000000  | 1.310720  | -2.281064 | 0.000000  |

Table S6 Coordinates of (C<sub>5</sub>F<sub>6</sub>)Fe(CO)<sub>2</sub> **12-3S** (C<sub>1</sub>)

| B3LYP/DZP |           |           | BP86/DZP  |           |           |           |
|-----------|-----------|-----------|-----------|-----------|-----------|-----------|
| C         | 0.037248  | 0.476963  | -0.810219 | 0.023593  | 0.386878  | -0.850277 |
| C         | -0.428192 | -0.919663 | -0.876818 | -0.418566 | -1.030955 | -0.744537 |
| C         | -1.704632 | -0.946891 | -0.129626 | -1.705372 | -0.991486 | -0.010146 |
| C         | -2.027252 | 0.267664  | 0.349326  | -2.056234 | 0.279613  | 0.318996  |
| Fe        | 1.390724  | -0.714625 | -0.142855 | 1.399536  | -0.702845 | -0.069531 |
| C         | 2.919907  | 0.256186  | 0.136355  | 2.919516  | 0.259733  | 0.090348  |
| C         | 0.974628  | -0.782450 | 1.564758  | 1.021026  | -0.538006 | 1.596534  |
| O         | 3.805235  | 0.970875  | 0.328020  | 3.827962  | 0.988927  | 0.224619  |
| O         | 0.706866  | -0.850552 | 2.686151  | 0.788134  | -0.447203 | 2.745453  |
| C         | -0.992815 | 1.305889  | -0.026431 | -1.032427 | 1.289817  | -0.169057 |
| F         | -2.982512 | 0.555167  | 1.232945  | -3.027983 | 0.651364  | 1.162445  |
| F         | -2.344791 | -2.083711 | 0.134609  | -2.332673 | -2.105876 | 0.387060  |
| F         | -0.401477 | -1.557176 | -2.105671 | -0.347829 | -1.829134 | -1.886170 |
| F         | 0.485012  | 1.058035  | -1.964703 | 0.474760  | 0.839747  | -2.065684 |
| F         | -1.496991 | 2.311936  | -0.794613 | -1.550768 | 2.191773  | -1.069169 |
| F         | -0.473575 | 1.901470  | 1.092631  | -0.529497 | 2.030638  | 0.877747  |

Table S7 Coordinates of (C<sub>5</sub>F<sub>6</sub>)Fe<sub>2</sub>(CO)<sub>8</sub> **28-1S** (C<sub>2</sub>)

| B3LYP/DZP |           |           | BP86/DZP  |           |           |           |
|-----------|-----------|-----------|-----------|-----------|-----------|-----------|
| C         | -0.301293 | 1.166694  | 0.753706  | -0.335019 | 1.163847  | 0.750657  |
| C         | -0.202972 | 0.714407  | -0.624146 | -0.225855 | 0.710052  | -0.635309 |
| C         | 0.202972  | -0.714407 | -0.624146 | 0.225855  | -0.710052 | -0.635309 |
| C         | 0.301293  | -1.166694 | 0.753706  | 0.335019  | -1.163847 | 0.750657  |
| F         | 1.372381  | -1.925538 | 1.137068  | 1.416098  | -1.911868 | 1.139382  |
| F         | 1.181387  | -1.078473 | -1.520415 | 1.196014  | -1.062351 | -1.549273 |
| F         | -1.372381 | 1.925538  | 1.137068  | -1.416098 | 1.911868  | 1.139382  |
| F         | -1.181387 | 1.078473  | -1.520415 | -1.196014 | 1.062351  | -1.549273 |
| C         | 0.000000  | 0.000000  | 1.705111  | 0.000000  | 0.000000  | 1.709357  |
| F         | 1.063270  | 0.229656  | 2.535028  | 1.066215  | 0.255778  | 2.543862  |
| F         | -1.063270 | -0.229656 | 2.535028  | -1.066215 | -0.255778 | 2.543862  |
| Fe        | 1.211915  | 2.135963  | -0.216458 | 1.185068  | 2.156612  | -0.215009 |
| C         | 2.030097  | 2.359104  | -1.833871 | 2.000693  | 2.382431  | -1.814500 |
| C         | 1.855529  | 3.253111  | 1.080564  | 1.795013  | 3.265515  | 1.080975  |
| C         | 0.000000  | 3.443275  | -0.698865 | 0.000000  | 3.450269  | -0.700985 |
| C         | 2.562473  | 0.954889  | 0.209369  | 2.547067  | 1.027655  | 0.208593  |
| O         | 3.482817  | 0.310308  | 0.441310  | 3.504939  | 0.409716  | 0.443396  |
| O         | -0.692070 | 4.302446  | -1.011564 | -0.684636 | 4.332895  | -1.024322 |
| O         | 2.519486  | 2.481152  | -2.869964 | 2.508202  | 2.518614  | -2.856846 |
| O         | 2.232531  | 3.947675  | 1.918582  | 2.168804  | 3.976067  | 1.927751  |
| Fe        | -1.211915 | -2.135963 | -0.216458 | -1.185068 | -2.156612 | -0.215009 |
| C         | -1.855529 | -3.253111 | 1.080564  | -1.795013 | -3.265515 | 1.080975  |
| C         | 0.000000  | -3.443275 | -0.698865 | 0.000000  | -3.450269 | -0.700985 |
| C         | -2.030097 | -2.359104 | -1.833871 | -2.000693 | -2.382431 | -1.814500 |
| C         | -2.562473 | -0.954889 | 0.209369  | -2.547067 | -1.027655 | 0.208593  |
| O         | -2.232531 | -3.947675 | 1.918582  | -2.168804 | -3.976067 | 1.927751  |
| O         | -2.519486 | -2.481152 | -2.869964 | -2.508202 | -2.518614 | -2.856846 |
| O         | 0.692070  | -4.302446 | -1.011564 | 0.684636  | -4.332895 | -1.024322 |
| O         | -3.482817 | -0.310308 | 0.441310  | -3.504939 | -0.409716 | 0.443396  |

Table S8 Coordinates of (C<sub>5</sub>F<sub>6</sub>)Fe<sub>2</sub>(CO)<sub>8</sub> **28-2S** (C<sub>s</sub>)

| B3LYP/DZP |           |           | BP86/DZP  |           |           |           |
|-----------|-----------|-----------|-----------|-----------|-----------|-----------|
| C         | 1.239426  | -0.408516 | 1.245646  | 1.289572  | -0.357133 | 1.253865  |
| C         | 0.782904  | 0.877508  | 0.770926  | 0.803105  | 0.924827  | 0.771445  |
| C         | 0.782904  | 0.877508  | -0.770926 | 0.803105  | 0.924827  | -0.771445 |
| C         | 1.239426  | -0.408516 | -1.245646 | 1.289572  | -0.357133 | -1.253865 |
| F         | 2.390819  | -0.489464 | -1.989826 | 2.427936  | -0.417337 | -2.027260 |
| F         | 1.410906  | 2.013742  | -1.220307 | 1.376300  | 2.089959  | -1.229841 |
| F         | 2.390819  | -0.489464 | 1.989826  | 2.427936  | -0.417337 | 2.027260  |
| F         | 1.410906  | 2.013742  | 1.220307  | 1.376300  | 2.089959  | 1.229841  |
| C         | 1.299738  | -1.354459 | 0.000000  | 1.389350  | -1.307120 | 0.000000  |
| F         | 2.458931  | -2.043870 | 0.000000  | 2.595376  | -1.935405 | 0.000000  |
| F         | 0.293530  | -2.291083 | 0.000000  | 0.429445  | -2.301057 | 0.000000  |
| Fe        | -0.406864 | 0.101721  | -2.307161 | -0.408566 | 0.087989  | -2.283649 |
| Fe        | -0.406864 | 0.101721  | 2.307161  | -0.408566 | 0.087989  | 2.283649  |
| C         | 0.633609  | 1.125963  | -3.457105 | 0.506908  | 1.156040  | -3.450294 |
| C         | -0.413224 | -1.121998 | -3.660405 | -0.393917 | -1.099755 | -3.643928 |
| C         | -1.700282 | 1.393314  | -2.373258 | -1.757468 | 1.300694  | -2.275526 |
| C         | -1.628794 | -1.037528 | -1.568654 | -1.543761 | -1.124490 | -1.566778 |
| C         | -1.628794 | -1.037528 | 1.568654  | -1.543761 | -1.124490 | 1.566778  |
| C         | -1.700282 | 1.393314  | 2.373258  | -1.757468 | 1.300694  | 2.275526  |
| C         | 0.633609  | 1.125963  | 3.457105  | 0.506908  | 1.156040  | 3.450294  |
| C         | -0.413224 | -1.121998 | 3.660405  | -0.393917 | -1.099755 | 3.643928  |
| O         | 1.186866  | 1.726034  | -4.261695 | 0.988087  | 1.797318  | -4.292645 |
| O         | -0.375259 | -1.900137 | -4.509649 | -0.352804 | -1.864057 | -4.525779 |
| O         | -2.498506 | 2.224793  | -2.366094 | -2.614819 | 2.091989  | -2.236005 |
| O         | -2.488624 | -1.771320 | -1.356137 | -2.373188 | -1.919872 | -1.367152 |
| O         | -2.498506 | 2.224793  | 2.366094  | -2.614819 | 2.091989  | 2.236005  |
| O         | -2.488624 | -1.771320 | 1.356137  | -2.373188 | -1.919872 | 1.367152  |
| O         | -0.375259 | -1.900137 | 4.509649  | -0.352804 | -1.864057 | 4.525779  |
| O         | 1.186866  | 1.726034  | 4.261695  | 0.988087  | 1.797318  | 4.292645  |

Table S9 Coordinates of (C<sub>5</sub>F<sub>6</sub>)Fe<sub>2</sub>(CO)<sub>7</sub> **27-1S** (C<sub>1</sub>)

| B3LYP/DZP |           |           | BP86/DZP  |           |           |           |
|-----------|-----------|-----------|-----------|-----------|-----------|-----------|
| C         | -1.752137 | 1.147186  | 0.521216  | -1.768336 | 1.179143  | 0.505326  |
| C         | -1.983740 | 0.868054  | -0.881536 | -2.015462 | 0.827991  | -0.878184 |
| C         | -0.712555 | 0.753737  | -1.446109 | -0.724264 | 0.668205  | -1.448884 |
| C         | 0.366609  | 1.360649  | -0.581658 | 0.354568  | 1.343955  | -0.624346 |
| F         | 1.053051  | 2.336466  | -1.313140 | 1.040596  | 2.290996  | -1.396346 |
| F         | -0.505075 | 0.518748  | -2.740675 | -0.530250 | 0.406029  | -2.750064 |
| F         | -2.777112 | 1.496065  | 1.329754  | -2.777086 | 1.513005  | 1.341813  |
| F         | -3.147894 | 0.796583  | -1.520099 | -3.187937 | 0.778147  | -1.520231 |
| C         | -0.521666 | 2.046183  | 0.507572  | -0.522443 | 2.069307  | 0.461861  |
| F         | -0.851737 | 3.318873  | 0.114306  | -0.851789 | 3.340917  | 0.026417  |
| F         | 0.054081  | 2.199231  | 1.730062  | 0.070911  | 2.254767  | 1.680529  |
| Fe        | 1.609698  | -0.155599 | 0.040702  | 1.603612  | -0.157540 | 0.055461  |
| Fe        | -1.146568 | -0.780075 | 0.103455  | -1.128499 | -0.779507 | 0.098869  |
| C         | 1.792536  | -0.654596 | -1.725814 | 1.928434  | -0.559725 | -1.700710 |
| C         | 3.092072  | 0.874708  | -0.068687 | 3.006683  | 0.954346  | 0.137843  |
| C         | 2.270299  | -1.805745 | 0.507810  | 2.393705  | -1.735555 | 0.499014  |
| C         | 1.518040  | 0.190175  | 1.848139  | 1.314724  | 0.059774  | 1.838435  |
| C         | -0.563152 | -2.211310 | -0.851167 | -0.340249 | -2.165348 | -0.728582 |
| C         | -2.815527 | -1.445752 | 0.118434  | -2.700256 | -1.573313 | -0.128092 |
| C         | -0.839987 | -1.325293 | 1.790571  | -1.114193 | -1.268648 | 1.829093  |
| O         | 2.039799  | -1.000701 | -2.793194 | 2.280991  | -0.840507 | -2.774157 |
| O         | 4.039409  | 1.524244  | -0.125100 | 3.927800  | 1.664562  | 0.215146  |
| O         | 2.689351  | -2.841565 | 0.787464  | 2.929866  | -2.735174 | 0.770818  |
| O         | 1.644247  | 0.297224  | 2.985926  | 1.349930  | 0.109650  | 3.003620  |
| O         | -0.248323 | -3.143854 | -1.457102 | 0.045026  | -3.127697 | -1.277443 |
| O         | -0.752679 | -1.708043 | 2.877382  | -1.223451 | -1.614357 | 2.940141  |
| O         | -3.858548 | -1.934074 | 0.151807  | -3.698961 | -2.168017 | -0.256661 |



Table S10 Coordinates of (C<sub>5</sub>F<sub>6</sub>)Fe<sub>2</sub>(CO)<sub>7</sub> **27-2S** (C<sub>1</sub>)

| B3LYP/DZP |           |           | BP86/DZP  |           |           |           |
|-----------|-----------|-----------|-----------|-----------|-----------|-----------|
| C         | -1.047426 | -0.938698 | -0.616695 | -1.045642 | -0.931737 | -0.620245 |
| C         | -0.672335 | 0.472515  | -0.727911 | -0.673222 | 0.501422  | -0.700416 |
| C         | 0.381070  | 0.755650  | 0.273432  | 0.377911  | 0.767156  | 0.314772  |
| C         | 0.696875  | -0.481553 | 0.969714  | 0.702038  | -0.491263 | 0.988778  |
| F         | 0.821051  | -0.466699 | 2.329966  | 0.842369  | -0.509626 | 2.350416  |
| F         | 0.238172  | 1.912662  | 1.002748  | 0.247331  | 1.920999  | 1.055983  |
| F         | -1.252837 | -1.653342 | -1.770703 | -1.247404 | -1.626190 | -1.793678 |
| F         | -0.546350 | 1.011048  | -1.994855 | -0.561027 | 1.078382  | -1.957965 |
| C         | -0.190665 | -1.621369 | 0.447515  | -0.180759 | -1.633874 | 0.438656  |
| F         | -0.923469 | -2.161148 | 1.467050  | -0.918075 | -2.196834 | 1.454630  |
| F         | 0.510992  | -2.666077 | -0.093124 | 0.530488  | -2.671440 | -0.126862 |
| Fe        | -2.591814 | 0.255558  | -0.273971 | -2.595168 | 0.251839  | -0.282980 |
| C         | -2.506385 | 0.420731  | 1.484047  | -2.532607 | 0.374483  | 1.441623  |
| C         | -4.011743 | -0.923093 | -0.178409 | -4.008495 | -0.904158 | -0.226609 |
| C         | -3.253365 | 1.965862  | -0.468786 | -3.293169 | 1.930239  | -0.426313 |
| O         | -3.622539 | 3.049747  | -0.591262 | -3.705879 | 3.020608  | -0.492589 |
| O         | -2.485272 | 0.541241  | 2.629781  | -2.544204 | 0.474713  | 2.608310  |
| O         | -4.867128 | -1.690750 | -0.113302 | -4.888954 | -1.667504 | -0.156934 |
| Fe        | 2.303505  | 0.169632  | -0.114002 | 2.308143  | 0.176658  | -0.111276 |
| C         | 3.561208  | -1.107815 | 0.246532  | 3.548259  | -1.102772 | 0.215329  |
| C         | 2.863576  | 1.105291  | 1.376802  | 2.906704  | 1.073386  | 1.356424  |
| C         | 2.936709  | 1.531945  | -1.151305 | 2.918800  | 1.546029  | -1.123720 |
| C         | 1.913449  | -0.729035 | -1.674434 | 1.933728  | -0.681823 | -1.669183 |
| O         | 4.331519  | -1.926734 | 0.497329  | 4.334831  | -1.934456 | 0.441430  |
| O         | 3.308259  | 2.411534  | -1.796703 | 3.295989  | 2.443582  | -1.767864 |
| O         | 3.281953  | 1.689266  | 2.270500  | 3.371940  | 1.647447  | 2.254135  |
| O         | 1.783487  | -1.267494 | -2.679524 | 1.823556  | -1.207023 | -2.702317 |

Table S11 Coordinates of  $(C_5F_6)Fe_2(CO)_7$  **27-3S** ( $C_s$ )

| B3LYP/DZP |           |           | BP86/DZP  |           |           |           |
|-----------|-----------|-----------|-----------|-----------|-----------|-----------|
| C         | -1.534638 | -0.052861 | 1.196419  | -1.535404 | -0.048411 | 1.205086  |
| C         | -0.945550 | -1.270312 | 0.767289  | -0.936400 | -1.281819 | 0.769710  |
| C         | -0.945550 | -1.270312 | -0.767289 | -0.936400 | -1.281819 | -0.769710 |
| C         | -1.534638 | -0.052861 | -1.196419 | -1.535404 | -0.048411 | -1.205086 |
| F         | -2.206831 | 0.035674  | -2.364748 | -2.222695 | 0.028955  | -2.373022 |
| F         | -1.117040 | -2.444364 | -1.390182 | -1.122298 | -2.461261 | -1.397147 |
| F         | -2.206831 | 0.035674  | 2.364748  | -2.222695 | 0.028955  | 2.373022  |
| F         | -1.117040 | -2.444364 | 1.390182  | -1.122298 | -2.461261 | 1.397147  |
| C         | -2.193515 | 0.631105  | 0.000000  | -2.200315 | 0.636336  | 0.000000  |
| F         | -3.530418 | 0.332931  | 0.000000  | -3.546062 | 0.320495  | 0.000000  |
| F         | -2.115336 | 1.986099  | 0.000000  | -2.133337 | 2.001185  | 0.000000  |
| Fe        | 0.555277  | 0.062621  | -1.344483 | 0.551427  | 0.059969  | -1.338961 |
| C         | 0.482382  | -0.647767 | -3.011430 | 0.505458  | -0.638376 | -2.991189 |
| C         | 0.264945  | 1.858465  | -1.583627 | 0.262004  | 1.845219  | -1.577795 |
| C         | 2.335506  | 0.312165  | -1.619635 | 2.310210  | 0.322415  | -1.614363 |
| C         | 2.335506  | 0.312165  | 1.619635  | 2.310210  | 0.322415  | 1.614363  |
| C         | 0.482382  | -0.647767 | 3.011430  | 0.505458  | -0.638376 | 2.991189  |
| C         | 0.264945  | 1.858465  | 1.583627  | 0.262004  | 1.845219  | 1.577795  |
| O         | 0.483017  | -1.081158 | -4.078017 | 0.532219  | -1.067265 | -4.076753 |
| O         | 0.115552  | 2.982230  | -1.786945 | 0.118848  | 2.983392  | -1.787762 |
| O         | 3.457306  | 0.482926  | -1.815170 | 3.440845  | 0.503193  | -1.841552 |
| O         | 3.457306  | 0.482926  | 1.815170  | 3.440845  | 0.503193  | 1.841552  |
| O         | 0.115552  | 2.982230  | 1.786945  | 0.118848  | 2.983392  | 1.787762  |
| O         | 0.483017  | -1.081158 | 4.078017  | 0.532219  | -1.067265 | 4.076753  |
| Fe        | 0.555277  | 0.062621  | 1.344483  | 0.551427  | 0.059969  | 1.338961  |
| C         | 1.276003  | -1.217044 | 0.000000  | 1.296599  | -1.213604 | 0.000000  |
| O         | 1.893297  | -2.224473 | 0.000000  | 1.916443  | -2.233233 | 0.000000  |

Table S12 Coordinates of (C<sub>5</sub>F<sub>6</sub>)Fe<sub>2</sub>(CO)<sub>7</sub> **27-4T** (C<sub>1</sub>)

|    | B3LYP/DZP |           |           | BP86/DZP  |           |           |
|----|-----------|-----------|-----------|-----------|-----------|-----------|
| C  | 1.039648  | 0.899805  | -0.655112 | -0.972362 | -1.153646 | -0.522222 |
| C  | 0.649091  | -0.470533 | -0.766634 | -0.630603 | 0.182682  | -0.910776 |
| C  | -0.397105 | -0.762436 | 0.239867  | 0.338876  | 0.746168  | 0.064618  |
| C  | -0.679539 | 0.463915  | 0.967001  | 0.683477  | -0.311405 | 1.018129  |
| F  | -0.780712 | 0.420300  | 2.329108  | 0.731337  | -0.018000 | 2.353612  |
| F  | -0.289472 | -1.943915 | 0.929496  | 0.124233  | 2.029848  | 0.506236  |
| F  | 1.288583  | 1.640463  | -1.771712 | -1.241955 | -2.106079 | -1.460711 |
| F  | 0.555493  | -1.056738 | -1.995338 | -0.586547 | 0.546168  | -2.223231 |
| C  | 0.238155  | 1.581784  | 0.456403  | -0.127681 | -1.586549 | 0.689854  |
| F  | 1.026091  | 2.053091  | 1.474047  | -0.867814 | -1.988208 | 1.774736  |
| F  | -0.427001 | 2.674307  | -0.027632 | 0.651913  | -2.673981 | 0.349931  |
| Fe | 2.636285  | -0.176237 | -0.015957 | -2.604901 | 0.058691  | -0.081061 |
| C  | 2.452016  | -1.108323 | 1.652208  | -2.742880 | 0.475327  | 1.697575  |
| C  | 4.036027  | 1.079739  | 0.183333  | -4.307841 | -0.498412 | -0.467749 |
| C  | 3.193459  | -1.646665 | -1.082921 | -2.826994 | 1.764668  | -0.656353 |
| O  | 3.500903  | -2.569722 | -1.697219 | -2.993745 | 2.869040  | -1.002517 |
| O  | 2.395015  | -1.693185 | 2.640377  | -2.878945 | 0.785523  | 2.816681  |
| O  | 4.861670  | 1.875824  | 0.260017  | -5.400410 | -0.822095 | -0.729931 |
| Fe | -2.312752 | -0.115543 | -0.115439 | 2.318739  | 0.179935  | -0.126775 |
| C  | -3.538709 | 1.179174  | 0.291833  | 3.579232  | -0.937978 | 0.540793  |
| C  | -2.881009 | -1.078158 | 1.355427  | 2.790622  | 1.407653  | 1.134781  |
| C  | -2.994007 | -1.430392 | -1.184300 | 2.969036  | 1.312964  | -1.381164 |
| C  | -1.911114 | 0.816736  | -1.652850 | 2.057337  | -1.010316 | -1.476893 |
| O  | -4.288383 | 2.007769  | 0.571360  | 4.374300  | -1.665564 | 0.986689  |
| O  | -3.396862 | -2.280136 | -1.850237 | 3.372676  | 2.058095  | -2.183372 |
| O  | -3.305033 | -1.674769 | 2.237963  | 3.177240  | 2.186709  | 1.905844  |
| O  | -1.768583 | 1.378070  | -2.643631 | 2.008678  | -1.744073 | -2.379015 |

Table S13 Coordinates of (C<sub>5</sub>F<sub>6</sub>)Fe<sub>2</sub>(CO)<sub>6</sub> **26-1S** (C<sub>1</sub>)

|    | B3LYP/DZP |           |           | BP86/DZP  |           |           |
|----|-----------|-----------|-----------|-----------|-----------|-----------|
| C  | 1.661318  | -1.205523 | 0.330904  | 1.684940  | -1.234134 | 0.267601  |
| C  | 1.693399  | -0.791993 | -1.041702 | 1.668946  | -0.744650 | -1.082749 |
| C  | 0.314996  | -0.650205 | -1.409194 | 0.247435  | -0.571425 | -1.393541 |
| C  | -0.582202 | -1.407952 | -0.478238 | -0.595870 | -1.442232 | -0.481419 |
| F  | -1.369466 | -2.373441 | -1.077429 | -1.376451 | -2.399345 | -1.096731 |
| F  | -0.051577 | -0.422233 | -2.683768 | -0.132485 | -0.343088 | -2.676558 |
| F  | 2.778767  | -1.579346 | 0.987366  | 2.823871  | -1.591215 | 0.899661  |
| F  | 2.727682  | -0.796241 | -1.885470 | 2.664390  | -0.745623 | -1.984312 |
| C  | 0.408606  | -2.035264 | 0.540053  | 0.439188  | -2.082195 | 0.498106  |
| F  | 0.625257  | -3.353466 | 0.247697  | 0.672066  | -3.396648 | 0.151733  |
| F  | -0.041941 | -2.017748 | 1.829263  | 0.029015  | -2.106777 | 1.806754  |
| Fe | -1.453555 | 0.280603  | 0.004574  | -1.437202 | 0.267925  | -0.005338 |
| Fe | 1.077543  | 0.769444  | 0.060502  | 1.067834  | 0.781031  | 0.048587  |
| C  | -2.842408 | -0.021804 | -1.118190 | -2.870760 | -0.003898 | -1.018039 |
| C  | -2.386558 | -0.438031 | 1.352208  | -2.300141 | -0.420126 | 1.365143  |
| C  | -1.918628 | 2.071441  | 0.296548  | -1.891519 | 2.033369  | 0.234621  |
| C  | 0.438184  | 1.044177  | 1.709380  | 0.420556  | 0.946854  | 1.711697  |
| C  | 2.767215  | 1.312076  | 0.373958  | 2.733337  | 1.332243  | 0.395877  |
| C  | 0.768942  | 2.318828  | -0.821799 | 0.768977  | 2.383980  | -0.709777 |
| O  | -3.698168 | -0.191498 | -1.864624 | -3.805766 | -0.159946 | -1.698314 |
| O  | -2.960017 | -0.900103 | 2.234859  | -2.882627 | -0.869972 | 2.271787  |
| O  | -2.264136 | 3.146130  | 0.508939  | -2.271126 | 3.116730  | 0.439884  |
| O  | 0.192850  | 1.253854  | 2.825318  | 0.197531  | 1.103642  | 2.853762  |
| O  | 0.621400  | 3.306842  | -1.404018 | 0.659365  | 3.433418  | -1.216062 |
| O  | 3.835652  | 1.685592  | 0.592715  | 3.808798  | 1.724215  | 0.629628  |

Table S14 Coordinates of  $(C_5F_6)Fe_2(CO)_6$  **26-2T** ( $C_1$ )

|    | B3LYP/DZP |           |           | BP86/DZP  |           |           |
|----|-----------|-----------|-----------|-----------|-----------|-----------|
| C  | -1.922969 | -0.873330 | -0.520578 | -1.988391 | -0.782458 | -0.543528 |
| C  | -2.119238 | -0.616538 | 0.892586  | -2.213934 | -0.385196 | 0.838143  |
| C  | -0.856361 | -0.684336 | 1.476848  | -0.971312 | -0.562827 | 1.493134  |
| C  | 0.162954  | -1.305791 | 0.556276  | 0.022369  | -1.293708 | 0.628912  |
| F  | 0.825397  | -2.345351 | 1.207801  | 0.674321  | -2.306487 | 1.332038  |
| F  | -0.602448 | -0.483415 | 2.762191  | -0.758142 | -0.341346 | 2.789247  |
| F  | -2.971309 | -1.066047 | -1.342238 | -3.000753 | -0.896035 | -1.426435 |
| F  | -3.256831 | -0.287933 | 1.487880  | -3.358373 | 0.018402  | 1.393066  |
| C  | -0.755166 | -1.862159 | -0.573398 | -0.900787 | -1.869358 | -0.498718 |
| F  | -1.163199 | -3.140687 | -0.313666 | -1.413385 | -3.101907 | -0.148569 |
| F  | -0.169452 | -1.910331 | -1.803237 | -0.288582 | -2.054605 | -1.708257 |
| Fe | 1.558544  | 0.135652  | -0.073548 | 1.515347  | 0.095704  | -0.079221 |
| Fe | -0.907028 | 0.844437  | -0.124650 | -0.822865 | 0.853972  | -0.137521 |
| C  | 2.411988  | 0.020189  | 1.571356  | 2.364865  | -0.048655 | 1.516208  |
| C  | 2.469978  | -1.170258 | -1.011763 | 2.345802  | -1.268891 | -0.937950 |
| C  | 2.648892  | 1.481723  | -0.681361 | 2.714476  | 1.313222  | -0.685482 |
| C  | -0.264142 | 1.066994  | -1.815793 | -0.048349 | 0.876351  | -1.786856 |
| C  | -2.331044 | 1.972373  | -0.354881 | -2.051934 | 2.103192  | -0.508358 |
| C  | -0.034370 | 2.078892  | 0.899644  | 0.097161  | 2.025387  | 0.900719  |
| O  | 2.989140  | -0.077802 | 2.563816  | 2.980310  | -0.146943 | 2.504913  |
| O  | 3.080742  | -1.980562 | -1.556188 | 2.951594  | -2.124788 | -1.452138 |
| O  | 3.343378  | 2.320115  | -1.063129 | 3.518299  | 2.071222  | -1.067452 |
| O  | -0.004625 | 1.247319  | -2.926600 | 0.214835  | 0.987505  | -2.925071 |
| O  | 0.383299  | 2.920016  | 1.573553  | 0.535558  | 2.865705  | 1.591138  |
| O  | -3.212180 | 2.692790  | -0.525082 | -2.815609 | 2.947781  | -0.769121 |

Table S15 Coordinates of  $(C_5F_6)Fe_2(CO)_6$  **26-3S** ( $C_2$ )

|    | B3LYP/DZP |           |           | BP86/DZP  |           |           |
|----|-----------|-----------|-----------|-----------|-----------|-----------|
| C  | -0.764342 | 0.921155  | 0.706309  | -0.759216 | 0.935687  | 0.713459  |
| C  | -0.479663 | 0.560774  | -0.685496 | -0.472838 | 0.569253  | -0.696511 |
| C  | 0.479663  | -0.560774 | -0.685496 | 0.472838  | -0.569253 | -0.696511 |
| C  | 0.764342  | -0.921155 | 0.706309  | 0.759216  | -0.935687 | 0.713459  |
| F  | 2.063402  | -1.192008 | 1.053283  | 2.060163  | -1.222669 | 1.060674  |
| F  | 1.540342  | -0.520458 | -1.569958 | 1.531992  | -0.557111 | -1.591937 |
| F  | -2.063402 | 1.192008  | 1.053283  | -2.060163 | 1.222669  | 1.060674  |
| F  | -1.540342 | 0.520458  | -1.569958 | -1.531992 | 0.557111  | -1.591937 |
| C  | 0.000000  | 0.000000  | 1.656263  | 0.000000  | 0.000000  | 1.668500  |
| F  | 0.864631  | 0.665487  | 2.481726  | 0.879817  | 0.660903  | 2.496552  |
| F  | -0.864631 | -0.665487 | 2.481726  | -0.879817 | -0.660903 | 2.496552  |
| Fe | 0.000000  | 2.447582  | -0.299446 | 0.000000  | 2.453876  | -0.301081 |
| C  | 1.720433  | 2.246673  | 0.049600  | 1.682842  | 2.253743  | 0.044467  |
| C  | -0.168513 | 3.849194  | 0.892553  | -0.154604 | 3.855644  | 0.860168  |
| C  | 0.349080  | 3.139019  | -1.973413 | 0.367879  | 3.170679  | -1.937538 |
| O  | 0.568708  | 3.529372  | -3.034396 | 0.629116  | 3.596133  | -2.993165 |
| O  | 2.848253  | 2.147415  | 0.265391  | 2.830717  | 2.170118  | 0.262315  |
| O  | -0.276808 | 4.692916  | 1.668258  | -0.226794 | 4.725994  | 1.634692  |
| Fe | 0.000000  | -2.447582 | -0.299446 | 0.000000  | -2.453876 | -0.301081 |
| C  | 0.168513  | -3.849194 | 0.892553  | 0.154604  | -3.855644 | 0.860168  |
| C  | -0.349080 | -3.139019 | -1.973413 | -0.367879 | -3.170679 | -1.937538 |
| C  | -1.720433 | -2.246673 | 0.049600  | -1.682842 | -2.253743 | 0.044467  |
| O  | 0.276808  | -4.692916 | 1.668258  | 0.226794  | -4.725994 | 1.634692  |
| O  | -0.568708 | -3.529372 | -3.034396 | -0.629116 | -3.596133 | -2.993165 |
| O  | -2.848253 | -2.147415 | 0.265391  | -2.830717 | -2.170118 | 0.262315  |

Table S16 Coordinates of  $(C_5F_6)Fe_2(CO)_6$  **26-4S** ( $C_1$ )

|    | B3LYP/DZP |           |           | BP86/DZP  |           |           |
|----|-----------|-----------|-----------|-----------|-----------|-----------|
| C  | -1.340752 | -0.846650 | 0.231681  | -1.340138 | -0.819147 | 0.292821  |
| C  | -0.781299 | -0.323888 | -1.021582 | -0.786320 | -0.361677 | -1.004378 |
| C  | 0.301465  | 0.626514  | -0.692263 | 0.296913  | 0.613112  | -0.735892 |
| C  | 0.424742  | 0.698115  | 0.755138  | 0.430755  | 0.769539  | 0.714478  |
| F  | 0.534527  | 1.921177  | 1.353825  | 0.550694  | 2.024514  | 1.247875  |
| F  | 0.330296  | 1.795339  | -1.417248 | 0.337456  | 1.730124  | -1.542295 |
| F  | -1.600596 | -2.187594 | 0.338869  | -1.612150 | -2.153756 | 0.480015  |
| F  | -0.595311 | -1.225792 | -2.064438 | -0.627634 | -1.317572 | -2.013978 |
| C  | -0.615261 | -0.215052 | 1.422531  | -0.604232 | -0.115433 | 1.449047  |
| F  | -1.441967 | 0.511772  | 2.230557  | -1.429741 | 0.657408  | 2.227788  |
| F  | -0.068695 | -1.181427 | 2.223194  | -0.042499 | -1.045582 | 2.297920  |
| Fe | -2.714720 | -0.010045 | -0.839223 | -2.719257 | -0.066524 | -0.829701 |
| C  | -2.693019 | 1.645764  | -0.234355 | -2.749183 | 1.557932  | -0.273610 |
| C  | -4.345794 | -0.373263 | -0.101766 | -4.348365 | -0.386726 | -0.132530 |
| O  | -2.709134 | 2.741569  | 0.128531  | -2.818843 | 2.680676  | 0.067317  |
| O  | -5.313388 | -0.622743 | 0.477705  | -5.351768 | -0.593550 | 0.439481  |
| Fe | 2.125224  | -0.080740 | -0.074254 | 2.130877  | -0.080467 | -0.076241 |
| C  | 3.175236  | -0.379859 | 1.392292  | 3.170050  | -0.292800 | 1.392527  |
| C  | 2.797477  | 1.636421  | -0.174405 | 2.833684  | 1.586910  | -0.283304 |
| C  | 2.964627  | -0.452780 | -1.650591 | 2.950284  | -0.552842 | -1.617478 |
| C  | 1.625574  | -1.852068 | -0.016054 | 1.649842  | -1.824481 | 0.090323  |
| O  | 3.813624  | -0.551978 | 2.335802  | 3.827289  | -0.416815 | 2.348830  |
| O  | 3.471543  | -0.670498 | -2.662873 | 3.466371  | -0.844950 | -2.623401 |
| O  | 3.286129  | 2.671571  | -0.243389 | 3.366101  | 2.611593  | -0.419971 |
| O  | 1.429302  | -2.982971 | 0.002199  | 1.472474  | -2.972053 | 0.178560  |

Table S17 Coordinates of  $(C_5F_6)Fe_2(CO)_5$  **25-1S** ( $C_1$ )

|    | B3LYP/DZP |           |           | BP86/DZP  |           |           |
|----|-----------|-----------|-----------|-----------|-----------|-----------|
| C  | -1.213936 | 1.430975  | 0.036030  | -1.167499 | 1.489088  | 0.194144  |
| C  | -1.323561 | 0.715397  | -1.201151 | -1.308663 | 0.884847  | -1.104341 |
| C  | 0.020086  | 0.202626  | -1.430330 | 0.043292  | 0.335535  | -1.383109 |
| C  | 1.038564  | 0.995145  | -0.666627 | 1.081417  | 1.092370  | -0.574755 |
| F  | 2.067342  | 1.565066  | -1.352038 | 2.113184  | 1.709722  | -1.210459 |
| F  | 0.327758  | -0.353839 | -2.620914 | 0.318497  | -0.079432 | -2.647181 |
| F  | -2.227389 | 2.177103  | 0.518280  | -2.163092 | 2.190342  | 0.775260  |
| F  | -2.265113 | 0.829870  | -2.142347 | -2.226294 | 1.157699  | -2.047699 |
| C  | 0.190436  | 2.013920  | 0.145507  | 0.257424  | 2.031626  | 0.364855  |
| F  | 0.259730  | 3.255476  | -0.420917 | 0.331103  | 3.340071  | -0.064792 |
| F  | 0.618824  | 2.172447  | 1.431821  | 0.699173  | 2.040269  | 1.662714  |
| Fe | 1.275410  | -0.654500 | 0.248914  | 1.233046  | -0.656229 | 0.163824  |
| Fe | -1.102843 | -0.643170 | 0.198569  | -1.102952 | -0.633803 | 0.115464  |
| C  | 2.604765  | -1.262505 | -0.795573 | 2.506182  | -1.288263 | -0.872024 |
| C  | 2.493475  | -0.217372 | 1.486112  | 2.478460  | -0.413308 | 1.380129  |
| C  | -1.126374 | -2.336680 | -0.445685 | -1.509026 | -2.082479 | -0.868037 |
| C  | -2.849431 | -0.738592 | 0.673089  | -2.693548 | -0.692874 | 0.948385  |
| C  | -0.443914 | -0.781454 | 1.877901  | -0.228048 | -1.297067 | 1.608186  |
| O  | 3.433435  | -1.689429 | -1.470776 | 3.339606  | -1.750458 | -1.552579 |
| O  | 3.254097  | 0.121767  | 2.281919  | 3.300371  | -0.211232 | 2.189687  |
| O  | -1.159794 | -3.406678 | -0.879899 | -1.786093 | -3.010291 | -1.521394 |
| O  | -0.303851 | -0.866826 | 3.029398  | -0.110258 | -1.789587 | 2.674708  |
| O  | -3.956106 | -0.809388 | 0.984961  | -3.718067 | -0.743940 | 1.505493  |



Table S18 Coordinates of  $(C_5F_6)Fe_2(CO)_5$  **25-2S** ( $C_1$ )

|    | B3LYP/DZP |           |           | BP86/DZP  |           |           |
|----|-----------|-----------|-----------|-----------|-----------|-----------|
| C  | 1.702933  | -0.916433 | 0.294634  | -1.616414 | 1.007109  | 0.260219  |
| C  | 1.510604  | -0.695138 | -1.106750 | -1.453924 | 0.671644  | -1.137732 |
| C  | 0.076700  | -0.730870 | -1.323964 | -0.004035 | 0.640334  | -1.368418 |
| C  | -0.601739 | -1.421963 | -0.169600 | 0.698930  | 1.440274  | -0.276718 |
| F  | -1.422929 | -2.479332 | -0.451687 | 1.541765  | 2.447395  | -0.650892 |
| F  | -0.381821 | -0.821487 | -2.592723 | 0.434098  | 0.638369  | -2.655415 |
| F  | 2.922888  | -1.117023 | 0.822304  | -2.825719 | 1.269573  | 0.791223  |
| F  | 2.414910  | -0.768640 | -2.080413 | -2.365277 | 0.779831  | -2.113531 |
| C  | 0.554405  | -1.805902 | 0.783622  | -0.433245 | 1.905464  | 0.682850  |
| F  | 0.888240  | -3.125697 | 0.640321  | -0.760610 | 3.228847  | 0.459879  |
| F  | 0.259024  | -1.640600 | 2.101443  | -0.113361 | 1.814666  | 2.009590  |
| Fe | -1.348906 | 0.398056  | -0.076985 | 1.319376  | -0.421521 | -0.045406 |
| Fe | 0.920638  | 0.887647  | -0.070635 | -0.916242 | -0.857892 | -0.037008 |
| C  | -2.865904 | -0.038360 | -0.982311 | 2.901732  | -0.195626 | -0.875308 |
| C  | -2.198179 | 0.275502  | 1.493135  | 2.071753  | -0.288259 | 1.550420  |
| C  | -1.414537 | 2.191274  | -0.444937 | 1.228398  | -2.214134 | -0.314554 |
| C  | 0.753873  | 1.263249  | 1.672464  | -0.978273 | -1.117066 | 1.721321  |
| C  | 2.468997  | 1.777905  | -0.433929 | -2.414597 | -1.777309 | -0.448709 |
| O  | -3.814681 | -0.290114 | -1.581499 | 3.922479  | -0.078375 | -1.429895 |
| O  | -2.704267 | 0.184360  | 2.525132  | 2.559532  | -0.205193 | 2.610939  |
| O  | -1.499007 | 3.320507  | -0.676471 | 1.239719  | -3.373656 | -0.491425 |
| O  | 0.750614  | 1.471587  | 2.809426  | -1.088221 | -1.253478 | 2.877451  |
| O  | 3.403494  | 2.407556  | -0.677745 | -3.343700 | -2.436545 | -0.715213 |

Table S19 Coordinates of  $(C_5F_6)Fe_2(CO)_5$  **25-3T**(C<sub>1</sub>)

|    | B3LYP/DZP |           |           | BP86/DZP  |           |           |
|----|-----------|-----------|-----------|-----------|-----------|-----------|
| C  | -1.638644 | 1.166346  | 0.189150  | -1.655076 | 1.072008  | 0.238446  |
| C  | -1.619480 | 0.536531  | -1.070181 | -1.655508 | 0.397420  | -1.024779 |
| C  | -0.217075 | 0.412248  | -1.443172 | -0.243823 | 0.404050  | -1.456514 |
| C  | 0.609966  | 1.400993  | -0.663443 | 0.523929  | 1.472369  | -0.716555 |
| F  | 1.335161  | 2.304920  | -1.401955 | 1.230019  | 2.387192  | -1.457186 |
| F  | 0.104382  | 0.094099  | -2.719333 | 0.061343  | 0.085668  | -2.742216 |
| F  | -2.766563 | 1.550677  | 0.806690  | -2.785358 | 1.386532  | 0.903437  |
| F  | -2.648912 | 0.261946  | -1.865280 | -2.698798 | 0.150762  | -1.833447 |
| C  | -0.407757 | 2.074443  | 0.289516  | -0.501532 | 2.090434  | 0.272342  |
| F  | -0.720822 | 3.332287  | -0.142499 | -0.935859 | 3.318339  | -0.185083 |
| F  | 0.046543  | 2.222732  | 1.565089  | -0.002918 | 2.312100  | 1.528027  |
| C  | 2.166838  | -1.962335 | -0.541066 | 2.338806  | -1.738033 | -0.593392 |
| C  | 3.019632  | 0.518967  | 0.512681  | 2.848604  | 0.659590  | 0.676056  |
| C  | 0.839394  | -0.735459 | 1.556855  | 0.714468  | -0.786199 | 1.550255  |
| C  | -1.358355 | -2.272899 | -0.672589 | -1.048933 | -2.377426 | -0.640881 |
| C  | -1.893502 | -1.196067 | 1.653908  | -1.879202 | -1.332721 | 1.522957  |
| O  | 2.573270  | -3.007547 | -0.807531 | 2.902241  | -2.711181 | -0.904842 |
| O  | 3.926376  | 1.045141  | 0.986641  | 3.694072  | 1.187708  | 1.283588  |
| O  | 1.106666  | -0.920638 | 2.674791  | 1.062792  | -0.988049 | 2.661061  |
| O  | -2.588820 | -1.445108 | 2.538805  | -2.603711 | -1.666221 | 2.377124  |
| O  | -1.703042 | -3.203277 | -1.258198 | -1.288161 | -3.370010 | -1.208972 |
| Fe | -0.812227 | -0.787827 | 0.265458  | -0.740550 | -0.830627 | 0.241937  |
| Fe | 1.517234  | -0.262370 | -0.193550 | 1.486545  | -0.152151 | -0.186286 |

Table S20 Coordinates of  $(C_5F_6)Fe_2(CO)_5$  **25-4S** ( $C_1$ )

|    | B3LYP/DZP |           |           | BP86/DZP  |           |           |
|----|-----------|-----------|-----------|-----------|-----------|-----------|
| C  | -2.029030 | -0.657601 | -0.137669 | -2.017138 | -0.605510 | -0.167967 |
| C  | -1.759723 | -0.206799 | 1.151212  | -1.762197 | -0.189613 | 1.161634  |
| C  | -0.355423 | -0.445455 | 1.440606  | -0.369986 | -0.483066 | 1.465593  |
| C  | 0.107690  | -1.570785 | 0.537951  | 0.102607  | -1.582119 | 0.535063  |
| F  | 0.473798  | -2.716182 | 1.213573  | 0.495393  | -2.746781 | 1.170836  |
| F  | 0.076433  | -0.420689 | 2.729042  | 0.083796  | -0.437083 | 2.747473  |
| F  | -3.222458 | -0.597168 | -0.732813 | -3.224085 | -0.553170 | -0.758093 |
| F  | -2.587049 | 0.493350  | 1.921324  | -2.599000 | 0.497599  | 1.951050  |
| C  | -1.079892 | -1.818777 | -0.430392 | -1.088113 | -1.801542 | -0.450960 |
| F  | -1.709646 | -2.994701 | -0.135984 | -1.752314 | -2.970730 | -0.147626 |
| F  | -0.722218 | -1.900656 | -1.738721 | -0.718327 | -1.901095 | -1.762977 |
| C  | 2.873585  | 0.946195  | 0.360449  | 2.857500  | 0.934444  | 0.360704  |
| C  | 2.486681  | -1.448505 | -0.818410 | 2.468151  | -1.414915 | -0.782225 |
| C  | 0.705704  | 0.566486  | -1.228598 | 0.731050  | 0.570220  | -1.243620 |
| C  | 0.264945  | 2.583141  | 0.558866  | 0.249947  | 2.527423  | 0.591733  |
| C  | -1.643296 | 2.050931  | -1.224899 | -1.609380 | 2.035041  | -1.223862 |
| O  | 3.766977  | 1.663341  | 0.485488  | 3.791086  | 1.629331  | 0.475525  |
| O  | 3.053673  | -2.185356 | -1.501316 | 3.067446  | -2.153001 | -1.466037 |
| O  | 0.819746  | 0.828826  | -2.374291 | 0.866514  | 0.838217  | -2.397768 |
| O  | -2.256385 | 2.605008  | -2.027222 | -2.211395 | 2.621199  | -2.035539 |
| O  | 0.811137  | 3.523742  | 0.944837  | 0.779441  | 3.484749  | 1.009507  |
| Fe | -0.685105 | 1.154550  | 0.025257  | -0.684254 | 1.127365  | 0.013538  |
| Fe | 1.540168  | -0.318129 | 0.175417  | 1.519310  | -0.292934 | 0.180000  |

Table S21 Coordinates of  $(C_5F_6)Fe_2(CO)_5$  **25-5S** ( $C_s$ )

|    | B3LYP/DZP |           |           | BP86/DZP  |           |           |
|----|-----------|-----------|-----------|-----------|-----------|-----------|
| C  | 1.416890  | 0.145327  | 1.225225  | 1.423963  | 0.163402  | 1.232367  |
| C  | 1.017345  | 1.445304  | 0.705629  | 0.934650  | 1.440569  | 0.719802  |
| C  | 1.017345  | 1.445304  | -0.705629 | 0.934650  | 1.440569  | -0.719802 |
| C  | 1.416890  | 0.145327  | -1.225225 | 1.423963  | 0.163402  | -1.232367 |
| F  | 2.178420  | 0.114353  | -2.360414 | 2.175763  | 0.141671  | -2.377458 |
| F  | 0.836366  | 2.535127  | -1.452017 | 0.772568  | 2.555271  | -1.453229 |
| F  | 2.178420  | 0.114353  | 2.360414  | 2.175763  | 0.141671  | 2.377458  |
| F  | 0.836366  | 2.535127  | 1.452017  | 0.772568  | 2.555271  | 1.453229  |
| C  | 2.058535  | -0.549658 | 0.000000  | 2.082020  | -0.521812 | 0.000000  |
| F  | 3.407629  | -0.320657 | 0.000000  | 3.435862  | -0.257220 | 0.000000  |
| F  | 1.905972  | -1.897783 | 0.000000  | 1.957367  | -1.881959 | 0.000000  |
| C  | -2.335933 | 0.565631  | -1.541378 | -2.311010 | 0.551404  | -1.528051 |
| C  | -0.535757 | -1.108136 | -2.668493 | -0.507526 | -1.105287 | -2.645375 |
| C  | -0.956624 | -1.181427 | 0.000000  | -0.977705 | -1.222353 | 0.000000  |
| C  | -2.335933 | 0.565631  | 1.541378  | -2.311010 | 0.551404  | 1.528051  |
| C  | -0.535757 | -1.108136 | 2.668493  | -0.507526 | -1.105287 | 2.645375  |
| O  | -3.427217 | 0.876074  | -1.750208 | -3.406703 | 0.879388  | -1.777621 |
| O  | -0.482739 | -1.910037 | -3.493338 | -0.447422 | -1.906091 | -3.493400 |
| O  | -1.334267 | -2.303415 | 0.000000  | -1.353066 | -2.356729 | 0.000000  |
| O  | -0.482739 | -1.910037 | 3.493338  | -0.447422 | -1.906091 | 3.493400  |
| O  | -3.427217 | 0.876074  | 1.750208  | -3.406703 | 0.879388  | 1.777621  |
| Fe | -0.581099 | 0.097212  | 1.348311  | -0.581256 | 0.074090  | 1.317431  |
| Fe | -0.581099 | 0.097212  | -1.348311 | -0.581256 | 0.074090  | -1.317431 |

Table S22 Coordinates of  $(C_5F_6)Fe_2(CO)_5$  **25-6T** ( $C_1$ )

|    | B3LYP/DZP |           |           | BP86/DZP  |           |           |
|----|-----------|-----------|-----------|-----------|-----------|-----------|
| C  | 1.055112  | -0.763181 | 0.677951  | 1.007881  | -0.904122 | 0.578031  |
| C  | 0.686944  | 0.636604  | 0.594178  | 0.671221  | 0.489702  | 0.793298  |
| C  | -0.346780 | 0.787194  | -0.448972 | -0.353769 | 0.902758  | -0.186740 |
| C  | -0.641779 | -0.535077 | -1.004550 | -0.650386 | -0.258679 | -1.066403 |
| F  | -0.805557 | -0.644572 | -2.363293 | -0.782266 | -0.025536 | -2.418988 |
| F  | -0.262797 | 1.851916  | -1.327005 | -0.302962 | 2.161618  | -0.763378 |
| F  | 1.226378  | -1.357259 | 1.892613  | 1.120380  | -1.781224 | 1.618154  |
| F  | 0.579014  | 1.376906  | 1.744395  | 0.675766  | 1.021453  | 2.055542  |
| C  | 0.270399  | -1.571488 | -0.358583 | 0.275580  | -1.416904 | -0.675148 |
| F  | 1.086557  | -2.132257 | -1.316323 | 1.176715  | -1.646213 | -1.720290 |
| F  | -0.392705 | -2.614018 | 0.219154  | -0.364919 | -2.605247 | -0.458874 |
| Fe | 2.571889  | 0.346684  | -0.105070 | 2.509419  | 0.313083  | -0.050418 |
| C  | 3.088583  | 2.109138  | -0.519391 | 3.355259  | 1.836763  | -0.670050 |
| C  | 3.853139  | -1.016526 | 0.171084  | 3.769438  | -0.887152 | 0.502304  |
| O  | 3.374346  | 3.212604  | -0.683863 | 3.904389  | 2.810349  | -1.014357 |
| O  | 4.576927  | -1.885392 | 0.386116  | 4.536435  | -1.679163 | 0.892270  |
| Fe | -2.252247 | 0.280699  | -0.188659 | -2.272870 | 0.350026  | -0.122338 |
| C  | -3.602504 | -0.883369 | -0.671931 | -3.610527 | -0.602085 | -0.921301 |
| C  | -3.011517 | 1.852402  | 0.406635  | -3.085729 | 1.671374  | 0.839684  |
| C  | -2.161739 | -0.377108 | 1.449115  | -2.234768 | -0.704073 | 1.249977  |
| O  | -4.415000 | -1.637672 | -0.982504 | -4.443542 | -1.249127 | -1.421071 |
| O  | -3.444638 | 2.849779  | 0.785966  | -3.576607 | 2.510657  | 1.485889  |
| O  | -2.132620 | -0.798062 | 2.521518  | -2.260663 | -1.408964 | 2.184802  |

Table S23 Harmonic vibrational frequencies( $\text{cm}^{-1}$ ) and IR intensities (KM/Mole) of  $(\text{C}_5\text{F}_6)\text{Fe}(\text{CO})_4$  **14-1S** ( $\text{C}_1$ )

| B3LYP/DZP                                                                                                                                                                                                                                                                                                                                                                                                                                                                                 | BP86/DZP                                                                                                                                                                                                                                                                                                                                                                                                                                                                                |
|-------------------------------------------------------------------------------------------------------------------------------------------------------------------------------------------------------------------------------------------------------------------------------------------------------------------------------------------------------------------------------------------------------------------------------------------------------------------------------------------|-----------------------------------------------------------------------------------------------------------------------------------------------------------------------------------------------------------------------------------------------------------------------------------------------------------------------------------------------------------------------------------------------------------------------------------------------------------------------------------------|
| 41(0), 50(0), 63(0), 72(0), 90(0), 97(0), 102(0), 106(0), 111(0), 128(0), 149(1), 202(5), 207(1), 222(1), 249(0), 263(1), 287(1), 295(1), 350(11), 383(1), 397(4), 400(2), 417(4), 429(4), 435(2), 441(32), 455(11), 471(6), 477(11), 501(15), 532(5), 561(0), 601(67), 620(9), 631(85), 641(149), 664(26), 716(138), 755(17), 796(3), 968(181), 997(173), 1117(79), 1133(85), 1149(13), 1266(203), 1350(156), 1384(204), 1405(50), 1777(120), 2097(976), 2117(477), 2128(938), 2178(295) | 38(0), 46(0), 61(0), 69(0), 87(0), 94(0), 98(0), 102(0), 106(0), 122(0), 143(0), 196(2), 199(0), 213(0), 239(0), 255(0), 278(1), 287(0), 340(10), 380(2), 392(0), 417(12), 419(9), 431(7), 437(0), 453(5), 459(0), 468(2), 474(4), 503(6), 516(11), 548(0), 595(15), 605(76), 631(34), 636(67), 643(139), 687(104), 719(44), 768(5), 934(176), 968(158), 1065(112), 1088(59), 1107(5), 1213(201), 1300(128), 1340(196), 1360(65), 1703(137), 2007(881), 2019(816), 2028(464), 2088(262) |

Table S24 Harmonic vibrational frequencies( $\text{cm}^{-1}$ ) and IR intensities (KM/Mole) of  $(\text{C}_5\text{F}_6)\text{Fe}(\text{CO})_3$  **13-1S** ( $\text{C}_s$ )

| B3LYP/DZP                                                                                                                                                                                                                                                                                                                                                                                                                           | BP86/DZP                                                                                                                                                                                                                                                                                                                                                                                                                           |
|-------------------------------------------------------------------------------------------------------------------------------------------------------------------------------------------------------------------------------------------------------------------------------------------------------------------------------------------------------------------------------------------------------------------------------------|------------------------------------------------------------------------------------------------------------------------------------------------------------------------------------------------------------------------------------------------------------------------------------------------------------------------------------------------------------------------------------------------------------------------------------|
| 38(0), 79(0), 85(0), 91(0), 92(0), 106(0), 132(0), 177(0), 193(2), 200(1), 203(1), 209(2), 235(0), 235(0), 288(1), 309(2), 333(2), 385(14), 432(4), 447(0), 447(4), 460(5), 474(34), 497(22), 509(6), 510(10), 527(1), 553(9), 595(66), 597(45), 624(21), 628(88), 695(1), 705(78), 794(0), 957(188), 993(200), 1072(204), 1112(18), 1174(22), 1316(313), 1372(56), 1486(73), 1514(173), 1606(233), 2098(762), 2103(788), 2148(663) | 35(0), 77(0), 83(0), 89(0), 90(0), 102(0), 126(0), 168(0), 190(1), 194(1), 199(0), 205(1), 226(0), 228(0), 280(1), 302(3), 322(1), 384(8), 440(1), 442(8), 452(9), 468(5), 478(11), 494(11), 499(14), 505(3), 521(3), 538(12), 583(39), 598(46), 615(27), 628(88), 656(2), 682(86), 764(0), 922(187), 963(173), 1022(218), 1071(19), 1135(6), 1267(278), 1324(61), 1439(88), 1460(204), 1543(243), 2000(679), 2009(716), 2057(530) |

Table S25 Harmonic vibrational frequencies( $\text{cm}^{-1}$ ) and IR intensities (KM/Mole) of  $(\text{C}_5\text{F}_6)\text{Fe}(\text{CO})_3$  **13-2S** ( $\text{C}_1$ )

| B3LYP/DZP                                                                                                                                                                                                                                                                                                                                                                                                                           | BP86/DZP                                                                                                                                                                                                                                                                                                                                                                                                                         |
|-------------------------------------------------------------------------------------------------------------------------------------------------------------------------------------------------------------------------------------------------------------------------------------------------------------------------------------------------------------------------------------------------------------------------------------|----------------------------------------------------------------------------------------------------------------------------------------------------------------------------------------------------------------------------------------------------------------------------------------------------------------------------------------------------------------------------------------------------------------------------------|
| 36(0), 53(0), 64(0), 71(0), 87(0), 96(0), 98(0), 124(0), 143(0), 183(3), 196(5), 207(5), 242(2), 254(2), 268(1), 280(7), 351(3), 375(2), 401(3), 420(2), 431(5), 432(10), 440(2), 451(9), 473(6), 489(8), 519(5), 556(55), 574(33), 595(36), 624(27), 663(18), 728(116), 762(16), 808(2), 970(192), 992(192), 1116(59), 1127(117), 1151(15), 1273(174), 1346(177), 1361(108), 1392(152), 1776(113), 2093(652), 2099(955), 2149(556) | 33(0), 50(0), 62(0), 70(0), 84(0), 93(0), 96(0), 119(0), 142(0), 176(3), 192(1), 198(5), 232(2), 245(2), 259(1), 272(7), 343(4), 369(2), 396(0), 415(4), 428(1), 442(1), 451(4), 453(2), 469(3), 494(3), 502(5), 570(43), 576(32), 600(34), 620(21), 634(21), 701(76), 727(30), 780(3), 934(190), 959(189), 1066(137), 1076(51), 1107(8), 1215(165), 1277(132), 1302(135), 1345(163), 1703(132), 1991(611), 1996(842), 2052(442) |

Table S26 Harmonic vibrational frequencies( $\text{cm}^{-1}$ ) and IR intensities (KM/Mole) of  $(\text{C}_5\text{F}_6)\text{Fe}(\text{CO})_2$  **12-1S** ( $\text{C}_s$ )

| B3LYP/DZP                                                                                                                                                                                                                                                                                                                                                                        | BP86/DZP                                                                                                                                                                                                                                                                                                                                                                        |
|----------------------------------------------------------------------------------------------------------------------------------------------------------------------------------------------------------------------------------------------------------------------------------------------------------------------------------------------------------------------------------|---------------------------------------------------------------------------------------------------------------------------------------------------------------------------------------------------------------------------------------------------------------------------------------------------------------------------------------------------------------------------------|
| 46(0), 68(2), 82(0), 86(0), 107(1), 171(1), 186(4), 192(1), 197(3), 214(3), 237(0), 238(0), 280(2), 317(0), 335(2), 370(36), 442(12), 444(7), 446(4), 460(48), 509(2), 512(14), 519(26), 551(10), 564(9), 612(24), 623(24), 649(1), 670(68), 795(0), 956(206), 989(191), 1058(212), 1127(48), 1150(7), 1306(521), 1378(52), 1508(65), 1551(141), 1589(202), 2079(945), 2121(901) | 50(0), 63(2), 80(0), 85(0), 101(0), 161(0), 181(2), 186(1), 196(1), 214(2), 229(0), 231(0), 272(1), 311(1), 328(0), 381(21), 426(8), 453(4), 472(0), 474(29), 487(7), 511(8), 523(28), 539(16), 577(10), 599(2), 601(1), 620(39), 646(62), 764(0), 920(213), 957(166), 1000(221), 1089(46), 1104(4), 1262(426), 1329(55), 1454(107), 1496(177), 1525(194), 1979(790), 2022(722) |

Table S27 Harmonic vibrational frequencies( $\text{cm}^{-1}$ ) and IR intensities (KM/Mole) of  $(\text{C}_5\text{F}_6)\text{Fe}(\text{CO})_2$  **12-2T** ( $\text{C}_s$ )

| B3LYP/DZP                                                                                                                                                                                                                                                                                                                                                                         | BP86/DZP                                                                                                                                                                                                                                                                                                                                                                       |
|-----------------------------------------------------------------------------------------------------------------------------------------------------------------------------------------------------------------------------------------------------------------------------------------------------------------------------------------------------------------------------------|--------------------------------------------------------------------------------------------------------------------------------------------------------------------------------------------------------------------------------------------------------------------------------------------------------------------------------------------------------------------------------|
| 45(0), 69(0), 70(0), 75(0), 121(0), 154(3), 173(3), 182(5), 184(3), 190(2), 235(0), 235(0), 268(0), 299(0), 303(8), 335(0), 356(34), 374(1), 394(17), 442(28), 449(17), 474(45), 488(36), 489(0), 503(1), 547(20), 607(7), 652(0), 668(19), 791(1), 946(141), 987(222), 1058(203), 1106(30), 1167(14), 1306(402), 1370(36), 1486(65), 1573(144), 1577(194), 2088(1176), 2133(774) | 41(0), 67(0), 71(0), 72(0), 113(0), 159(0), 177(2), 183(3), 183(1), 203(0), 225(0), 227(0), 260(0), 294(0), 303(2), 334(0), 390(0), 395(36), 426(0), 433(14), 455(5), 479(1), 504(50), 514(14), 516(1), 535(53), 590(2), 614(2), 652(19), 761(1), 904(142), 955(184), 1006(223), 1062(33), 1126(0), 1257(317), 1321(53), 1428(108), 1483(214), 1516(244), 1980(978), 2022(721) |

Table S28 Harmonic vibrational frequencies( $\text{cm}^{-1}$ ) and IR intensities (KM/Mole) of  $(\text{C}_5\text{F}_6)\text{Fe}(\text{CO})_2$  **12-3S** ( $\text{C}_1$ )

| B3LYP/DZP                                                                                                                                                                                                                                                                                                                                                                           | BP86/DZP                                                                                                                                                                                                                                                                                                                                                                        |
|-------------------------------------------------------------------------------------------------------------------------------------------------------------------------------------------------------------------------------------------------------------------------------------------------------------------------------------------------------------------------------------|---------------------------------------------------------------------------------------------------------------------------------------------------------------------------------------------------------------------------------------------------------------------------------------------------------------------------------------------------------------------------------|
| 41(0), 57(0), 74(0), 88(0), 93(0), 124(0), 145(1), 172(12), 199(3), 204(5), 242(2), 254(2), 268(1), 290(10), 356(3), 387(2), 416(3), 435(2), 436(1), 450(7), 473(15), 500(2), 520(5), 546(12), 593(17), 624(11), 661(17), 718(85), 762(46), 811(14), 963(212), 992(170), 1111(39), 1124(123), 1150(23), 1272(151), 1332(134), 1346(133), 1390(202), 1771(111), 2071(882), 2116(732) | 40(0), 54(0), 72(1), 87(0), 91(0), 118(0), 145(1), 169(10), 192(1), 197(3), 232(2), 245(2), 260(1), 280(8), 344(3), 375(1), 418(1), 422(1), 444(1), 456(1), 476(2), 500(7), 515(0), 564(12), 602(10), 619(11), 634(11), 686(49), 728(58), 781(9), 925(216), 958(162), 1066(78), 1068(96), 1108(11), 1216(139), 1261(139), 1294(126), 1343(199), 1698(126), 1962(745), 2011(556) |

Table S29 Harmonic vibrational frequencies( $\text{cm}^{-1}$ ) and IR intensities (KM/Mole) of  $\text{Fe}_2(\text{C}_5\text{F}_6)(\text{CO})_8$  **28-1S** ( $\text{C}_2$ )

| B3LYP/DZP                                                                                                                                                                                                                                                                                                                                                                                                                                                                                                                                                                                                                                                                                                                 | BP86/DZP                                                                                                                                                                                                                                                                                                                                                                                                                                                                                                                                                                                                                                                                                                              |
|---------------------------------------------------------------------------------------------------------------------------------------------------------------------------------------------------------------------------------------------------------------------------------------------------------------------------------------------------------------------------------------------------------------------------------------------------------------------------------------------------------------------------------------------------------------------------------------------------------------------------------------------------------------------------------------------------------------------------|-----------------------------------------------------------------------------------------------------------------------------------------------------------------------------------------------------------------------------------------------------------------------------------------------------------------------------------------------------------------------------------------------------------------------------------------------------------------------------------------------------------------------------------------------------------------------------------------------------------------------------------------------------------------------------------------------------------------------|
| 34(0), 38(0), 40(0), 50(0), 62(0), 63(1), 69(0), 81(0), 93(0), 97(0), 98(0), 101(0), 105(0), 111(0), 111(0), 115(0), 119(0), 133(1), 155(4), 156(0), 210(6), 218(0), 224(1), 234(1), 252(0), 277(0), 289(1), 299(0), 301(6), 382(0), 382(4), 397(2), 399(0), 403(41), 403(0), 416(1), 420(14), 426(6), 437(1), 438(28), 442(3), 448(84), 454(1), 457(1), 458(21), 469(0), 477(0), 501(45), 510(2), 562(0), 562(1), 576(139), 603(6), 607(186), 616(0), 629(34), 634(140), 638(338), 645(17), 723(3), 725(42), 751(17), 791(3), 942(147), 976(178), 1079(31), 1104(0), 1120(77), 1254(232), 1258(65), 1281(19), 1390(100), 1398(1), 2091(104), 2094(1765), 2113(861), 2117(13), 2123(132), 2129(1985), 2167(771), 2182(23) | 33(0), 35(0), 38(0), 47(0), 59(0), 61(0), 65(0), 77(0), 89(0), 94(0), 95(0), 98(0), 100(0), 107(0), 107(0), 110(0), 115(0), 129(0), 150(2), 151(0), 203(3), 211(0), 217(0), 225(0), 243(0), 268(0), 279(0), 289(0), 294(1), 379(0), 382(14), 394(15), 397(0), 414(3), 423(1), 430(5), 433(29), 435(47), 436(0), 438(3), 443(1), 456(2), 457(0), 465(1), 469(0), 474(1), 475(7), 513(23), 515(1), 549(0), 549(3), 554(139), 595(5), 604(5), 608(184), 634(59), 638(123), 640(316), 647(19), 691(47), 703(0), 713(17), 763(1), 908(153), 950(146), 1043(32), 1067(0), 1070(75), 1202(212), 1210(50), 1244(34), 1345(96), 1352(0), 2005(82), 2008(1529), 2018(163), 2022(1017), 2026(5), 2026(1426), 2080(788), 2093(20) |

Table S30 Harmonic vibrational frequencies( $\text{cm}^{-1}$ ) and IR intensities (KM/Mole) of  $\text{Fe}_2(\text{C}_5\text{F}_6)(\text{CO})_8$  **28-2S** ( $\text{C}_s$ )

| B3LYP/DZP                                                                                                                                                                                                                                                                                                                                                                                                                                                                                                                                                                                                                                                                                                                           | BP86/DZP                                                                                                                                                                                                                                                                                                                                                                                                                                                                                                                                                                                                                                                                                                                    |
|-------------------------------------------------------------------------------------------------------------------------------------------------------------------------------------------------------------------------------------------------------------------------------------------------------------------------------------------------------------------------------------------------------------------------------------------------------------------------------------------------------------------------------------------------------------------------------------------------------------------------------------------------------------------------------------------------------------------------------------|-----------------------------------------------------------------------------------------------------------------------------------------------------------------------------------------------------------------------------------------------------------------------------------------------------------------------------------------------------------------------------------------------------------------------------------------------------------------------------------------------------------------------------------------------------------------------------------------------------------------------------------------------------------------------------------------------------------------------------|
| -23(0), 28(0), 38(0), 52(0), 57(1), 58(0), 79(0), 81(0), 88(0), 94(0), 94(0), 106(0), 107(0), 108(0), 109(0), 115(0), 127(0), 153(1), 181(0), 187(0), 190(3), 196(8), 213(1), 225(2), 265(4), 276(3), 293(2), 307(0), 345(1), 356(5), 373(0), 387(5), 389(0), 396(11), 400(4), 409(58), 417(0), 425(52), 428(18), 432(3), 436(6), 438(0), 452(9), 458(9), 460(16), 490(2), 495(7), 515(12), 517(41), 558(131), 564(12), 567(10), 598(41), 604(48), 609(30), 632(79), 635(218), 639(133), 644(91), 670(14), 738(11), 773(22), 789(146), 929(128), 953(32), 1054(26), 1078(103), 1128(15), 1199(126), 1203(0), 1265(261), 1395(81), 1404(39), 2085(183), 2089(638), 2092(1513), 2112(239), 2116(42), 2126(1556), 2161(1095), 2179(89) | -22(0), 26(0), 35(0), 49(0), 54(0), 55(0), 78(0), 81(0), 83(0), 90(0), 91(0), 104(0), 104(0), 106(0), 107(0), 110(0), 123(0), 147(0), 175(0), 180(0), 183(0), 189(5), 205(0), 215(3), 255(4), 270(3), 286(1), 300(0), 334(2), 345(2), 360(0), 391(10), 392(0), 407(36), 415(1), 419(5), 424(2), 430(16), 431(3), 433(9), 440(3), 458(2), 462(2), 471(4), 475(1), 481(3), 483(8), 524(5), 526(20), 549(35), 551(81), 552(6), 580(22), 601(35), 603(84), 634(320), 636(14), 637(13), 645(172), 652(22), 700(8), 745(12), 759(127), 896(119), 927(46), 1010(12), 1044(82), 1084(15), 1157(0), 1162(153), 1208(224), 1348(116), 1359(26), 1994(478), 1999(282), 2006(1172), 2020(800), 2020(6), 2025(863), 2071(990), 2088(117) |



Table S31 Harmonic vibrational frequencies( $\text{cm}^{-1}$ ) and IR intensities (KM/Mole) of  $\text{Fe}_2(\text{C}_5\text{F}_6)(\text{CO})_7$  **27-1S** ( $\text{C}_1$ )

| B3LYP/DZP                                                                                                                                                                                                                                                                                                                                                                                                                                                                                                                                                                                                                                                                        | BP86/DZP                                                                                                                                                                                                                                                                                                                                                                                                                                                                                                                                                                                                                                                                    |
|----------------------------------------------------------------------------------------------------------------------------------------------------------------------------------------------------------------------------------------------------------------------------------------------------------------------------------------------------------------------------------------------------------------------------------------------------------------------------------------------------------------------------------------------------------------------------------------------------------------------------------------------------------------------------------|-----------------------------------------------------------------------------------------------------------------------------------------------------------------------------------------------------------------------------------------------------------------------------------------------------------------------------------------------------------------------------------------------------------------------------------------------------------------------------------------------------------------------------------------------------------------------------------------------------------------------------------------------------------------------------|
| 33(0), 45(0), 55(0), 63(0), 77(0), 81(0), 90(0), 92(0), 97(0), 101(0), 111(0), 115(0), 122(0), 130(1), 135(2), 157(0), 171(1), 174(0), 180(3), 209(2), 210(0), 226(2), 240(2), 245(0), 267(2), 278(2), 299(2), 338(10), 389(13), 396(3), 400(1), 412(9), 416(1), 424(25), 429(1), 441(5), 445(1), 453(2), 460(8), 479(23), 486(5), 493(7), 501(27), 517(3), 520(20), 546(46), 564(1), 570(35), 586(31), 593(48), 602(46), 617(176), 625(29), 627(35), 641(127), 736(29), 777(34), 823(101), 933(138), 967(165), 1069(16), 1084(50), 1127(158), 1222(75), 1274(186), 1355(88), 1468(117), 1611(181), 2063(217), 2070(75), 2097(636), 2109(1356), 2111(681), 2117(1594), 2168(482) | 14(0), 46(0), 55(0), 58(0), 75(0), 81(0), 87(0), 92(0), 94(0), 98(0), 109(0), 114(0), 116(0), 129(1), 137(1), 153(1), 166(1), 171(2), 182(1), 201(1), 206(0), 219(1), 230(1), 238(0), 257(2), 272(1), 291(3), 330(6), 380(2), 396(1), 406(3), 412(3), 422(2), 425(8), 431(5), 437(18), 456(5), 462(0), 473(1), 475(5), 493(1), 495(4), 510(6), 519(9), 524(15), 543(20), 548(1), 561(12), 581(47), 590(27), 593(56), 609(43), 610(134), 628(49), 635(142), 693(20), 745(35), 786(101), 902(136), 937(142), 1030(17), 1040(60), 1080(140), 1176(93), 1224(170), 1309(74), 1434(120), 1525(214), 1969(126), 1988(50), 2009(478), 2011(1292), 2021(184), 2032(1567), 2080(423) |

Table S32 Harmonic vibrational frequencies( $\text{cm}^{-1}$ ) and IR intensities (KM/Mole) of  $\text{Fe}_2(\text{C}_5\text{F}_6)(\text{CO})_7$  **27-2S** ( $\text{C}_1$ )

| B3LYP/DZP                                                                                                                                                                                                                                                                                                                                                                                                                                                                                                                                                                                                                                                                   | BP86/DZP                                                                                                                                                                                                                                                                                                                                                                                                                                                                                                                                                                                                                                                               |
|-----------------------------------------------------------------------------------------------------------------------------------------------------------------------------------------------------------------------------------------------------------------------------------------------------------------------------------------------------------------------------------------------------------------------------------------------------------------------------------------------------------------------------------------------------------------------------------------------------------------------------------------------------------------------------|------------------------------------------------------------------------------------------------------------------------------------------------------------------------------------------------------------------------------------------------------------------------------------------------------------------------------------------------------------------------------------------------------------------------------------------------------------------------------------------------------------------------------------------------------------------------------------------------------------------------------------------------------------------------|
| 32(0), 36(0), 41(0), 50(0), 63(0), 64(0), 69(0), 86(0), 88(0), 94(0), 98(0), 100(0), 107(0), 110(0), 113(0), 125(0), 149(2), 154(1), 186(5), 208(10), 219(2), 225(1), 246(8), 254(1), 280(0), 291(8), 297(2), 372(2), 383(2), 398(1), 402(17), 405(2), 418(6), 422(3), 426(4), 431(10), 438(8), 441(5), 445(3), 452(46), 458(11), 462(12), 473(3), 485(12), 506(19), 551(48), 562(4), 568(80), 588(45), 597(88), 607(100), 620(79), 632(76), 642(174), 725(19), 735(24), 753(15), 794(6), 948(157), 971(182), 1073(22), 1104(2), 1119(82), 1256(148), 1266(150), 1284(11), 1358(74), 1392(37), 2091(68), 2094(1736), 2095(596), 2114(550), 2125(1126), 2144(874), 2176(220) | 30(0), 35(0), 38(0), 46(0), 59(0), 62(0), 68(0), 81(0), 85(0), 91(0), 96(0), 96(0), 103(0), 106(0), 109(0), 121(0), 146(1), 152(0), 177(4), 201(6), 211(1), 217(0), 237(9), 243(0), 270(0), 283(5), 288(2), 365(1), 382(6), 395(9), 401(1), 414(4), 423(8), 427(4), 436(8), 438(15), 440(4), 447(4), 454(2), 456(4), 462(0), 470(2), 475(4), 491(10), 515(11), 549(1), 557(15), 572(121), 584(63), 596(46), 609(125), 626(27), 638(69), 644(184), 696(37), 709(5), 717(12), 766(4), 913(166), 944(157), 1033(22), 1063(11), 1071(73), 1206(129), 1210(129), 1243(28), 1284(65), 1345(47), 1993(498), 1994(631), 2007(1005), 2020(882), 2026(533), 2050(712), 2087(269) |

Table S33 Harmonic vibrational frequencies( $\text{cm}^{-1}$ ) and IR intensities (KM/Mole) of  $\text{Fe}_2(\text{C}_5\text{F}_6)(\text{CO})_7$  **27-3S** ( $\text{C}_s$ )

| B3LYP/DZP                                                                                                                                                                                                                                                                                                                                                                                                                                                                                                                                                                                                                                                                        | BP86/DZP                                                                                                                                                                                                                                                                                                                                                                                                                                                                                                                                                                                                                                                                   |
|----------------------------------------------------------------------------------------------------------------------------------------------------------------------------------------------------------------------------------------------------------------------------------------------------------------------------------------------------------------------------------------------------------------------------------------------------------------------------------------------------------------------------------------------------------------------------------------------------------------------------------------------------------------------------------|----------------------------------------------------------------------------------------------------------------------------------------------------------------------------------------------------------------------------------------------------------------------------------------------------------------------------------------------------------------------------------------------------------------------------------------------------------------------------------------------------------------------------------------------------------------------------------------------------------------------------------------------------------------------------|
| 8(3), 46(0), 60(2), 70(0), 76(0), 81(0), 96(0), 97(0), 106(0), 106(1), 113(0), 114(0), 126(0), 127(0), 139(0), 169(0), 179(30), 195(7), 203(0), 212(9), 213(0), 223(0), 251(5), 252(0), 269(0), 270(2), 301(11), 302(37), 315(11), 374(5), 384(20), 392(0), 423(4), 425(8), 427(27), 437(1), 443(3), 444(19), 456(12), 464(17), 469(4), 478(1), 502(63), 515(22), 521(0), 540(51), 544(10), 571(167), 577(52), 596(24), 601(105), 605(90), 619(30), 643(181), 655(28), 734(28), 748(57), 782(1), 954(123), 983(132), 1107(57), 1122(0), 1148(85), 1303(330), 1310(10), 1320(111), 1504(169), 1513(83), 1892(466), 2084(0), 2090(9), 2101(813), 2109(1141), 2119(2007), 2157(491) | 21(0), 46(0), 62(1), 66(0), 73(0), 79(0), 92(0), 93(0), 102(0), 102(0), 108(0), 109(0), 123(0), 123(0), 132(0), 164(0), 187(3), 193(3), 198(0), 211(0), 220(6), 220(0), 246(0), 251(5), 262(0), 262(2), 303(2), 303(6), 341(54), 380(1), 383(15), 390(2), 412(5), 423(1), 433(7), 436(28), 441(0), 456(7), 459(18), 476(1), 484(7), 490(3), 500(31), 516(11), 519(4), 532(6), 549(8), 564(154), 579(27), 583(45), 592(84), 597(79), 614(35), 636(199), 640(22), 707(25), 727(65), 750(1), 919(113), 952(125), 1053(78), 1074(0), 1101(58), 1247(302), 1256(14), 1267(105), 1426(239), 1432(86), 1835(378), 1993(83), 2002(8), 2006(647), 2021(1030), 2034(1526), 2067(424) |

Table S34 Harmonic vibrational frequencies( $\text{cm}^{-1}$ ) and IR intensities (KM/Mole) of  $\text{Fe}_2(\text{C}_5\text{F}_6)(\text{CO})_7$  **27-4T** ( $\text{C}_1$ )

| B3LYP/DZP                                                                                                                                                                                                                                                                                                                                                                                                                                                                                                                                                                                                                                                                     | BP86/DZP                                                                                                                                                                                                                                                                                                                                                                                                                                                                                                                                                                                                                                                            |
|-------------------------------------------------------------------------------------------------------------------------------------------------------------------------------------------------------------------------------------------------------------------------------------------------------------------------------------------------------------------------------------------------------------------------------------------------------------------------------------------------------------------------------------------------------------------------------------------------------------------------------------------------------------------------------|---------------------------------------------------------------------------------------------------------------------------------------------------------------------------------------------------------------------------------------------------------------------------------------------------------------------------------------------------------------------------------------------------------------------------------------------------------------------------------------------------------------------------------------------------------------------------------------------------------------------------------------------------------------------|
| 10(0), 35(0), 40(1), 48(0), 53(1), 61(1), 63(0), 65(0), 72(1), 86(0), 94(0), 98(0), 100(1), 106(1), 110(1), 119(3), 136(2), 148(5), 192(7), 204(6), 214(0), 228(2), 242(1), 256(0), 278(0), 291(3), 295(1), 297(3), 322(33), 344(7), 367(37), 377(21), 381(7), 384(10), 398(13), 399(0), 413(28), 420(18), 428(1), 435(1), 438(2), 444(90), 451(36), 457(11), 463(12), 472(23), 483(50), 506(19), 539(135), 562(0), 603(77), 613(7), 631(78), 641(179), 701(11), 719(57), 738(10), 790(5), 936(119), 978(179), 1088(42), 1107(18), 1115(72), 1254(262), 1266(70), 1298(29), 1396(56), 1456(58), 2085(793), 2090(436), 2094(1517), 2114(639), 2126(1130), 2138(962), 2176(237) | 16(0), 33(0), 36(0), 44(0), 52(1), 62(0), 63(0), 69(1), 76(0), 82(0), 91(0), 92(0), 97(0), 104(0), 109(0), 112(2), 124(0), 147(2), 187(0), 195(2), 206(0), 219(0), 229(2), 246(0), 267(1), 284(0), 287(0), 310(1), 340(2), 370(28), 378(9), 388(0), 399(7), 419(2), 421(38), 425(16), 433(44), 436(0), 450(5), 456(26), 459(4), 464(7), 468(9), 473(6), 506(34), 512(38), 517(91), 529(20), 536(9), 549(0), 593(8), 605(82), 635(68), 642(173), 657(15), 678(9), 698(59), 761(4), 908(139), 950(128), 1054(45), 1060(64), 1077(25), 1202(243), 1218(51), 1264(41), 1343(57), 1422(51), 1971(889), 1984(574), 2009(857), 2019(1073), 2024(918), 2029(287), 2088(365) |

Table S35 Harmonic vibrational frequencies( $\text{cm}^{-1}$ ) and IR intensities (KM/Mole) of  $\text{Fe}_2(\text{C}_5\text{F}_6)(\text{CO})_6$  **26-1S** ( $\text{C}_1$ )

| B3LYP/DZP                                                                                                                                                                                                                                                                                                                                                                                                                                                                                                                                                                                                                      | BP86/DZP                                                                                                                                                                                                                                                                                                                                                                                                                                                                                                                                                                                                             |
|--------------------------------------------------------------------------------------------------------------------------------------------------------------------------------------------------------------------------------------------------------------------------------------------------------------------------------------------------------------------------------------------------------------------------------------------------------------------------------------------------------------------------------------------------------------------------------------------------------------------------------|----------------------------------------------------------------------------------------------------------------------------------------------------------------------------------------------------------------------------------------------------------------------------------------------------------------------------------------------------------------------------------------------------------------------------------------------------------------------------------------------------------------------------------------------------------------------------------------------------------------------|
| 30(0), 46(0), 55(0), 70(0), 79(0), 82(1), 85(0), 91(1), 100(0), 102(0), 105(0), 107(0), 112(0), 131(1), 142(2), 167(2), 185(3), 203(0), 214(1), 216(2), 234(2), 244(1), 264(1), 284(2), 312(3), 341(3), 363(16), 382(4), 404(7), 409(2), 415(9), 426(1), 441(7), 445(5), 452(5), 469(26), 476(6), 488(6), 496(18), 508(20), 525(26), 532(37), 543(41), 562(39), 576(56), 586(5), 607(44), 618(109), 629(17), 633(32), 709(16), 767(15), 836(107), 932(126), 975(120), 1086(73), 1091(18), 1128(102), 1235(188), 1276(181), 1347(134), 1447(101), 1532(256), 2037(571), 2069(257), 2108(674), 2115(1166), 2121(1163), 2162(609) | 36(0), 45(0), 51(0), 68(0), 76(0), 80(0), 83(0), 90(0), 98(0), 100(1), 101(1), 107(0), 111(0), 132(1), 142(0), 166(1), 187(0), 193(2), 208(1), 213(1), 226(1), 238(0), 257(1), 278(2), 305(2), 327(1), 359(5), 394(3), 398(5), 409(16), 425(7), 426(5), 436(3), 454(6), 463(6), 478(3), 483(3), 490(6), 502(3), 511(5), 523(10), 536(49), 540(29), 567(72), 581(5), 588(14), 593(43), 610(96), 619(11), 639(50), 669(6), 735(16), 794(90), 900(119), 933(67), 1039(106), 1056(9), 1085(104), 1181(206), 1210(151), 1288(162), 1351(204), 1480(224), 1967(353), 1983(80), 2006(518), 2008(804), 2029(1540), 2065(444) |

Table S36 Harmonic vibrational frequencies( $\text{cm}^{-1}$ ) and IR intensities (KM/Mole) of  $\text{Fe}_2(\text{C}_5\text{F}_6)(\text{CO})_6$  **26-2T** ( $\text{C}_1$ )

| B3LYP/DZP                                                                                                                                                                                                                                                                                                                                                                                                                                                                                                                                                                                                            | BP86/DZP                                                                                                                                                                                                                                                                                                                                                                                                                                                                                                                                                                                                         |
|----------------------------------------------------------------------------------------------------------------------------------------------------------------------------------------------------------------------------------------------------------------------------------------------------------------------------------------------------------------------------------------------------------------------------------------------------------------------------------------------------------------------------------------------------------------------------------------------------------------------|------------------------------------------------------------------------------------------------------------------------------------------------------------------------------------------------------------------------------------------------------------------------------------------------------------------------------------------------------------------------------------------------------------------------------------------------------------------------------------------------------------------------------------------------------------------------------------------------------------------|
| 35(0), 46(0), 51(0), 60(0), 68(0), 82(0), 84(0), 86(0), 91(0), 92(0), 97(0), 105(0), 109(0), 113(1), 151(2), 157(0), 169(0), 191(1), 214(3), 224(2), 234(1), 240(0), 260(3), 273(0), 298(2), 333(3), 335(0), 343(4), 387(2), 394(3), 403(1), 409(14), 419(1), 423(6), 434(8), 449(33), 453(0), 463(4), 472(27), 482(9), 498(2), 503(26), 522(34), 545(24), 549(76), 563(19), 564(32), 575(53), 585(9), 617(9), 731(19), 764(59), 793(25), 936(107), 971(139), 1071(38), 1095(42), 1132(153), 1220(69), 1262(239), 1367(74), 1474(152), 1621(233), 2059(184), 2070(204), 2083(1367), 2085(636), 2113(1692), 2145(420) | 37(0), 41(0), 47(0), 60(0), 72(0), 84(0), 85(0), 87(0), 88(0), 91(0), 96(0), 103(0), 111(1), 117(0), 145(3), 161(2), 172(0), 194(0), 205(2), 221(0), 228(1), 235(0), 250(2), 264(1), 288(2), 324(5), 331(12), 352(0), 393(3), 404(1), 409(40), 414(2), 426(2), 445(3), 447(9), 455(0), 462(1), 473(17), 476(31), 487(5), 489(5), 497(7), 527(24), 540(39), 548(79), 558(36), 562(44), 573(10), 587(49), 598(4), 678(5), 715(91), 756(7), 906(118), 933(126), 1032(34), 1046(82), 1088(117), 1182(98), 1219(213), 1330(78), 1433(162), 1543(274), 1956(283), 1972(5), 1985(793), 1990(866), 2016(1447), 2045(376) |

Table S37 Harmonic vibrational frequencies( $\text{cm}^{-1}$ ) and IR intensities (KM/Mole) of  $\text{Fe}_2(\text{C}_5\text{F}_6)(\text{CO})_6$  **26-3S** ( $\text{C}_2$ )

| B3LYP/DZP                                                                                                                                                                                                                                                                                                                                                                                                                                                                                                                                                                                                       | BP86/DZP                                                                                                                                                                                                                                                                                                                                                                                                                                                                                                                                                                                                     |
|-----------------------------------------------------------------------------------------------------------------------------------------------------------------------------------------------------------------------------------------------------------------------------------------------------------------------------------------------------------------------------------------------------------------------------------------------------------------------------------------------------------------------------------------------------------------------------------------------------------------|--------------------------------------------------------------------------------------------------------------------------------------------------------------------------------------------------------------------------------------------------------------------------------------------------------------------------------------------------------------------------------------------------------------------------------------------------------------------------------------------------------------------------------------------------------------------------------------------------------------|
| 32(0), 35(0), 40(0), 43(0), 66(0), 66(0), 71(1), 81(0), 87(0), 89(0), 95(0), 101(0), 104(0), 119(0), 142(3), 151(0), 180(3), 188(6), 207(17), 221(0), 244(1), 254(0), 255(13), 277(13), 283(0), 370(0), 372(4), 399(6), 405(0), 422(5), 423(0), 429(5), 431(1), 433(19), 435(4), 443(0), 447(0), 459(24), 461(0), 485(28), 486(2), 549(75), 554(4), 567(70), 574(71), 590(45), 594(4), 615(232), 618(9), 733(1), 738(38), 752(14), 799(8), 955(165), 965(192), 1069(14), 1101(1), 1119(91), 1264(76), 1269(212), 1289(4), 1347(127), 1364(2), 2091(10), 2092(102), 2094(1729), 2095(1306), 2137(1508), 2152(18) | 31(0), 34(0), 38(0), 40(0), 63(0), 65(0), 71(0), 79(0), 84(0), 87(0), 93(0), 99(0), 102(0), 117(0), 141(1), 153(0), 172(2), 181(4), 203(11), 213(0), 236(1), 244(0), 245(13), 269(14), 273(0), 361(0), 368(3), 397(6), 405(0), 413(4), 424(5), 430(0), 434(2), 442(4), 448(0), 452(5), 454(2), 463(0), 468(2), 487(14), 494(3), 557(12), 569(1), 572(88), 580(62), 592(23), 606(184), 625(66), 628(1), 705(32), 709(2), 719(7), 772(5), 919(175), 935(177), 1025(12), 1058(1), 1071(95), 1205(55), 1214(190), 1244(7), 1270(147), 1289(0), 1991(111), 1992(256), 1994(955), 1995(1466), 2045(1215), 2056(13) |

Table S38 Harmonic vibrational frequencies( $\text{cm}^{-1}$ ) and IR intensities (KM/Mole) of  $\text{Fe}_2(\text{C}_5\text{F}_6)(\text{CO})_6$  **26-4S** ( $\text{C}_1$ )

| B3LYP/DZP                                                                                                                                                                                                                                                                                                                                                                                                                                                                                                                                                                                                                  | BP86/DZP                                                                                                                                                                                                                                                                                                                                                                                                                                                                                                                                                                                                          |
|----------------------------------------------------------------------------------------------------------------------------------------------------------------------------------------------------------------------------------------------------------------------------------------------------------------------------------------------------------------------------------------------------------------------------------------------------------------------------------------------------------------------------------------------------------------------------------------------------------------------------|-------------------------------------------------------------------------------------------------------------------------------------------------------------------------------------------------------------------------------------------------------------------------------------------------------------------------------------------------------------------------------------------------------------------------------------------------------------------------------------------------------------------------------------------------------------------------------------------------------------------|
| 35(0), 40(0), 45(0), 54(0), 64(0), 71(0), 87(0), 89(0), 95(0), 99(0), 102(0), 107(0), 114(0), 125(1), 151(4), 152(1), 174(21), 208(7), 217(1), 225(0), 251(11), 255(0), 279(0), 293(7), 298(5), 380(1), 387(2), 399(1), 404(18), 413(0), 419(4), 430(1), 435(10), 439(12), 447(31), 451(32), 458(11), 464(2), 473(3), 497(15), 506(13), 546(12), 563(2), 576(146), 593(8), 606(94), 621(45), 633(78), 642(178), 722(17), 737(19), 748(28), 793(24), 942(177), 971(186), 1067(6), 1104(6), 1123(74), 1254(116), 1265(172), 1281(23), 1344(83), 1392(39), 2068(844), 2090(1006), 2108(1371), 2115(72), 2124(1150), 2174(308) | 33(0), 38(0), 43(0), 51(0), 62(0), 69(0), 85(0), 88(0), 93(0), 96(0), 99(0), 104(0), 109(0), 122(0), 146(2), 155(0), 170(17), 201(3), 208(0), 216(0), 243(8), 245(2), 270(0), 284(4), 289(2), 373(1), 385(9), 394(9), 411(1), 424(8), 429(2), 435(13), 438(7), 446(12), 450(3), 461(2), 467(3), 475(5), 477(3), 508(6), 515(11), 549(1), 558(49), 570(65), 598(20), 609(105), 630(24), 637(60), 644(185), 697(41), 702(4), 716(23), 765(18), 906(188), 943(157), 1023(8), 1064(10), 1076(68), 1201(97), 1213(142), 1237(53), 1281(67), 1342(47), 1961(673), 2005(927), 2007(926), 2018(743), 2025(450), 2086(338) |

Table S39 Harmonic vibrational frequencies( $\text{cm}^{-1}$ ) and IR intensities (KM/Mole) of  $\text{Fe}_2(\text{C}_5\text{F}_6)(\text{CO})_5$  **25-1S** ( $\text{C}_1$ )

| B3LYP/DZP                                                                                                                                                                                                                                                                                                                                                                                                                                                                                                                                                               | BP86/DZP                                                                                                                                                                                                                                                                                                                                                                                                                                                                                                                                                        |
|-------------------------------------------------------------------------------------------------------------------------------------------------------------------------------------------------------------------------------------------------------------------------------------------------------------------------------------------------------------------------------------------------------------------------------------------------------------------------------------------------------------------------------------------------------------------------|-----------------------------------------------------------------------------------------------------------------------------------------------------------------------------------------------------------------------------------------------------------------------------------------------------------------------------------------------------------------------------------------------------------------------------------------------------------------------------------------------------------------------------------------------------------------|
| 29(0), 54(0), 59(0), 66(0), 79(0), 84(0), 90(0), 96(0), 99(0), 112(1), 116(1), 146(1), 163(2), 173(6), 198(3), 203(1), 212(1), 226(3), 237(1), 251(0), 267(1), 272(1), 325(2), 349(6), 365(3), 399(1), 415(3), 419(4), 430(2), 446(4), 456(2), 464(13), 476(12), 488(13), 499(4), 515(4), 524(58), 532(41), 557(43), 574(23), 582(18), 602(41), 612(131), 636(23), 645(10), 712(9), 763(17), 824(105), 933(106), 975(70), 1079(74), 1106(26), 1128(103), 1247(296), 1281(143), 1344(165), 1411(166), 1520(247), 2024(533), 2082(350), 2095(1029), 2113(1826), 2140(348) | 26(0), 51(0), 57(0), 68(0), 73(0), 80(0), 85(0), 94(0), 98(0), 108(1), 115(1), 152(1), 171(1), 186(1), 192(0), 201(1), 206(1), 229(1), 233(2), 247(0), 260(1), 267(1), 320(1), 335(7), 347(2), 392(8), 407(8), 413(2), 435(0), 454(4), 460(1), 465(3), 484(3), 487(8), 500(0), 516(17), 523(37), 541(51), 556(38), 577(22), 579(4), 587(13), 600(71), 631(78), 652(6), 677(7), 731(16), 776(76), 900(101), 935(65), 1030(89), 1058(25), 1083(94), 1196(283), 1223(139), 1286(185), 1321(230), 1468(272), 1915(408), 1982(489), 2005(694), 2017(1547), 2044(345) |

Table S40 Harmonic vibrational frequencies( $\text{cm}^{-1}$ ) and IR intensities (KM/Mole) of  $\text{Fe}_2(\text{C}_5\text{F}_6)(\text{CO})_5$  **25-2S** ( $\text{C}_1$ )

| B3LYP/DZP                                                                                                                                                                                                                                                                                                                                                                                                                                                                                                                                                              | BP86/DZP                                                                                                                                                                                                                                                                                                                                                                                                                                                                                                                                                        |
|------------------------------------------------------------------------------------------------------------------------------------------------------------------------------------------------------------------------------------------------------------------------------------------------------------------------------------------------------------------------------------------------------------------------------------------------------------------------------------------------------------------------------------------------------------------------|-----------------------------------------------------------------------------------------------------------------------------------------------------------------------------------------------------------------------------------------------------------------------------------------------------------------------------------------------------------------------------------------------------------------------------------------------------------------------------------------------------------------------------------------------------------------|
| 43(0), 49(2), 53(0), 71(0), 79(0), 81(0), 87(1), 94(0), 96(0), 97(0), 113(1), 124(3), 165(0), 180(1), 199(3), 201(0), 212(2), 227(0), 242(3), 246(1), 262(1), 275(2), 316(1), 351(2), 368(30), 396(1), 403(17), 412(0), 430(1), 437(8), 443(0), 449(16), 474(6), 478(3), 494(28), 501(16), 520(55), 528(14), 533(58), 555(65), 572(34), 581(27), 592(35), 619(39), 628(22), 723(7), 757(48), 800(73), 935(151), 962(97), 1081(74), 1097(25), 1135(112), 1249(207), 1267(206), 1335(156), 1419(134), 1526(232), 2066(580), 2070(189), 2095(1373), 2108(1552), 2144(493) | 35(0), 42(0), 55(0), 69(0), 78(0), 78(0), 83(1), 89(0), 92(0), 95(0), 109(1), 120(1), 161(0), 185(0), 198(0), 202(2), 209(1), 222(0), 238(0), 246(1), 256(1), 265(2), 313(1), 339(1), 377(8), 394(3), 403(1), 410(12), 431(2), 438(5), 446(2), 464(4), 473(1), 482(2), 499(6), 502(4), 524(50), 528(17), 545(35), 564(76), 570(29), 589(4), 594(53), 604(13), 623(40), 690(3), 724(46), 760(66), 899(137), 929(66), 1031(76), 1054(33), 1091(87), 1202(257), 1206(180), 1276(181), 1342(170), 1457(273), 1967(437), 1985(204), 1997(990), 2015(1415), 2047(427) |

Table S41 Harmonic vibrational frequencies( $\text{cm}^{-1}$ ) and IR intensities (KM/Mole) of  $\text{Fe}_2(\text{C}_5\text{F}_6)(\text{CO})_5$  **25-3T** ( $\text{C}_1$ )

| B3LYP/DZP                                                                                                                                                                                                                                                                                                                                                                                                                                                                                                                                                          | BP86/DZP                                                                                                                                                                                                                                                                                                                                                                                                                                                                                                                                                             |
|--------------------------------------------------------------------------------------------------------------------------------------------------------------------------------------------------------------------------------------------------------------------------------------------------------------------------------------------------------------------------------------------------------------------------------------------------------------------------------------------------------------------------------------------------------------------|----------------------------------------------------------------------------------------------------------------------------------------------------------------------------------------------------------------------------------------------------------------------------------------------------------------------------------------------------------------------------------------------------------------------------------------------------------------------------------------------------------------------------------------------------------------------|
| 43(0), 45(0), 53(0), 62(0), 73(0), 75(1), 79(0), 86(0), 91(0), 107(1), 127(0), 153(2), 163(3), 176(0), 189(2), 202(3), 211(2), 218(0), 232(3), 245(3), 259(2), 264(1), 308(4), 316(3), 333(2), 369(7), 376(5), 393(22), 406(13), 413(9), 420(5), 425(5), 443(18), 453(6), 458(9), 484(26), 495(3), 507(51), 524(53), 531(4), 534(20), 563(47), 569(3), 589(40), 620(5), 702(11), 761(27), 817(68), 942(120), 970(92), 1080(62), 1097(41), 1134(119), 1243(170), 1260(253), 1332(154), 1423(144), 1580(166), 1986(508), 2078(98), 2091(1309), 2108(1757), 2142(476) | 31(0), 42(0), 47(0), 63(0), 73(0), 75(0), 75(0), 84(0), 92(0), 107(1), 121(0), 151(1), 161(0), 181(1), 190(1), 197(2), 206(1), 221(0), 234(1), 245(1), 246(2), 256(1), 305(2), 309(5), 331(1), 367(14), 389(13), 393(11), 400(5), 417(7), 430(10), 435(5), 450(2), 457(8), 475(9), 482(4), 497(18), 512(20), 520(53), 533(37), 543(29), 556(9), 567(15), 594(38), 607(27), 666(5), 726(26), 774(54), 903(114), 934(112), 1031(83), 1053(28), 1086(94), 1200(252), 1213(177), 1285(180), 1342(187), 1488(224), 1893(361), 1985(55), 1998(1207), 2012(1564), 2044(438) |

Table S42 Harmonic vibrational frequencies( $\text{cm}^{-1}$ ) and IR intensities (KM/Mole) of  $\text{Fe}_2(\text{C}_5\text{F}_6)(\text{CO})_5$  **25-4S** ( $\text{C}_1$ )

| B3LYP/DZP                                                                                                                                                                                                                                                                                                                                                                                                                                                                                                                                                                  | BP86/DZP                                                                                                                                                                                                                                                                                                                                                                                                                                                                                                                                                           |
|----------------------------------------------------------------------------------------------------------------------------------------------------------------------------------------------------------------------------------------------------------------------------------------------------------------------------------------------------------------------------------------------------------------------------------------------------------------------------------------------------------------------------------------------------------------------------|--------------------------------------------------------------------------------------------------------------------------------------------------------------------------------------------------------------------------------------------------------------------------------------------------------------------------------------------------------------------------------------------------------------------------------------------------------------------------------------------------------------------------------------------------------------------|
| 36(0), 55(0), 59(0), 65(1), 74(2), 78(2), 82(2), 92(1), 98(1), 107(2), 119(6), 131(1), 148(3), 164(1), 184(2), 194(3), 212(4), 216(3), 239(0), 252(3), 260(12), 268(2), 304(2), 317(3), 375(19), 391(4), 398(11), 413(23), 421(21), 435(6), 441(12), 449(20), 463(11), 469(19), 489(13), 496(18), 508(18), 525(16), 551(25), 570(0), 583(12), 593(7), 610(68), 615(39), 638(50), 707(2), 767(10), 834(49), 944(129), 986(63), 1081(66), 1102(35), 1142(123), 1222(117), 1263(201), 1330(165), 1424(160), 1618(113), 1897(396), 2066(56), 2087(1402), 2095(2154), 2138(646) | 34(0), 49(0), 56(0), 63(1), 73(1), 76(1), 82(1), 90(0), 98(1), 104(0), 119(2), 131(4), 140(1), 157(0), 179(1), 197(2), 207(3), 211(1), 231(0), 244(0), 254(3), 265(2), 296(2), 313(2), 369(9), 381(7), 384(11), 408(2), 430(9), 440(34), 443(5), 448(8), 464(6), 475(4), 481(16), 491(6), 503(11), 530(17), 545(12), 561(1), 579(5), 589(29), 593(14), 611(46), 630(60), 672(7), 737(14), 799(52), 910(109), 947(69), 1033(54), 1055(37), 1092(121), 1182(124), 1204(229), 1277(141), 1394(161), 1524(149), 1833(242), 1968(17), 1988(1091), 2002(1819), 2039(501) |

Table S43 Harmonic vibrational frequencies( $\text{cm}^{-1}$ ) and IR intensities (KM/Mole) of  $\text{Fe}_2(\text{C}_5\text{F}_6)(\text{CO})_5$  **25-5S** ( $\text{C}_s$ )

| B3LYP/DZP                                                                                                                                                                                                                                                                                                                                                                                                                                                                                                                                                         | BP86/DZP                                                                                                                                                                                                                                                                                                                                                                                                                                                                                                                                                      |
|-------------------------------------------------------------------------------------------------------------------------------------------------------------------------------------------------------------------------------------------------------------------------------------------------------------------------------------------------------------------------------------------------------------------------------------------------------------------------------------------------------------------------------------------------------------------|---------------------------------------------------------------------------------------------------------------------------------------------------------------------------------------------------------------------------------------------------------------------------------------------------------------------------------------------------------------------------------------------------------------------------------------------------------------------------------------------------------------------------------------------------------------|
| -47(1), 47(0), 59(0), 66(1), 67(1), 79(0), 81(1), 89(0), 89(0), 105(0), 114(1), 121(3), 142(1), 166(0), 194(4), 211(0), 223(2), 231(3), 240(4), 252(1), 258(3), 274(8), 300(0), 313(6), 346(0), 390(7), 402(9), 413(25), 418(2), 420(0), 440(2), 445(2), 448(27), 457(42), 475(6), 497(16), 514(12), 535(10), 538(0), 557(25), 562(0), 584(23), 617(42), 623(68), 624(6), 739(16), 758(57), 796(1), 950(113), 974(130), 1072(1), 1089(65), 1142(161), 1257(301), 1270(3), 1381(161), 1438(88), 1551(180), 1884(342), 2063(152), 2090(1366), 2101(2061), 2140(591) | -33(1), 48(0), 54(0), 62(0), 64(1), 76(0), 78(1), 85(0), 86(0), 98(0), 110(1), 111(3), 155(1), 161(0), 200(3), 203(0), 217(0), 223(2), 236(2), 242(1), 247(2), 276(3), 293(0), 315(4), 365(3), 379(11), 399(8), 412(7), 412(6), 422(0), 437(3), 450(1), 455(3), 461(15), 478(19), 494(6), 504(8), 519(0), 527(16), 547(3), 552(30), 576(27), 602(4), 607(60), 613(37), 698(21), 724(51), 762(4), 916(107), 939(129), 1023(1), 1051(83), 1093(124), 1199(307), 1222(3), 1348(183), 1393(93), 1460(167), 1821(252), 1964(80), 1989(1193), 2010(1619), 2039(449) |

Table S44 Harmonic vibrational frequencies( $\text{cm}^{-1}$ ) and IR intensities (KM/Mole) of  $\text{Fe}_2(\text{C}_5\text{F}_6)(\text{CO})_5$  **25-6T** ( $\text{C}_1$ )

| B3LYP/DZP                                                                                                                                                                                                                                                                                                                                                                                                                                                                                                                                                            | BP86/DZP                                                                                                                                                                                                                                                                                                                                                                                                                                                                                                                                                     |
|----------------------------------------------------------------------------------------------------------------------------------------------------------------------------------------------------------------------------------------------------------------------------------------------------------------------------------------------------------------------------------------------------------------------------------------------------------------------------------------------------------------------------------------------------------------------|--------------------------------------------------------------------------------------------------------------------------------------------------------------------------------------------------------------------------------------------------------------------------------------------------------------------------------------------------------------------------------------------------------------------------------------------------------------------------------------------------------------------------------------------------------------|
| 5(0), 32(0), 37(0), 44(0), 56(0), 61(1), 67(1), 70(1), 78(0), 87(0), 96(0), 110(1), 121(5), 142(0), 181(6), 190(3), 206(9), 218(1), 245(5), 254(1), 262(4), 265(4), 281(1), 284(10), 369(4), 372(0), 385(1), 393(16), 406(11), 419(13), 422(3), 423(35), 432(9), 436(18), 446(4), 456(84), 464(12), 478(9), 489(7), 549(26), 560(142), 579(44), 596(61), 613(15), 712(14), 737(26), 744(25), 784(17), 943(124), 964(191), 1074(20), 1091(40), 1120(63), 1260(190), 1268(141), 1285(36), 1358(85), 1406(62), 2073(1143), 2092(1104), 2094(683), 2126(1467), 2148(201) | 21(0), 27(0), 34(0), 38(0), 51(0), 55(1), 67(0), 74(0), 78(1), 84(0), 94(0), 107(1), 118(3), 144(1), 171(6), 185(5), 203(5), 208(0), 233(5), 241(1), 253(1), 268(0), 277(9), 322(1), 356(1), 363(9), 381(1), 394(3), 406(13), 413(5), 426(4), 438(5), 443(1), 454(4), 458(1), 472(3), 482(37), 487(5), 498(23), 528(78), 566(110), 580(67), 586(11), 622(27), 668(10), 681(47), 716(22), 762(6), 901(158), 940(163), 1020(60), 1039(8), 1080(28), 1212(59), 1214(224), 1258(76), 1275(53), 1389(66), 1964(1021), 1992(650), 1995(798), 2010(1624), 2052(361) |

**Table S45.** Total energies ( $E$  and  $E_{\text{ZPVE}}$ , in Hartree), relative energies with and without ZPVE corrections ( $\Delta E$  and  $\Delta E_{\text{ZPVE}}$  in kcal/mol),  $\Delta H$  and  $\Delta G$  (in kcal/mol) at the standard condition, the LUMO-HOMO gaps (in eV), and number of imaginary vibrational frequencies ( $N_{\text{imag}}$ ) for the  $(\text{C}_5\text{F}_6)\text{Fe}(\text{CO})_4$  and  $(\text{C}_5\text{F}_6)\text{Fe}(\text{CO})_3$  structures.

|                          | <b>14-1S(C<sub>1</sub>)</b> | <b>13-1S(C<sub>s</sub>)</b> | <b>13-2S(C<sub>1</sub>)</b> |
|--------------------------|-----------------------------|-----------------------------|-----------------------------|
| <b>B3LYP</b>             |                             |                             |                             |
| $-E$                     | 2506.90577                  | 2393.56112                  | 2393.52102                  |
| $-E_{\text{ZPVE}}$       | 2506.82495                  | 2393.48860                  | 2393.44962                  |
| $\Delta E$               | 0.0                         | 0.0                         | 25.2                        |
| $\Delta E_{\text{ZPVE}}$ | 0.0                         | 0.0                         | 24.5                        |
| $\Delta H$               | 0.0                         | 0.0                         | 24.8                        |
| $\Delta G$               | 0.0                         | 0.0                         | 23.3                        |
| $N_{\text{imag}}$        | none                        | none                        | none                        |
| LUMO-HOMO                | 5.0                         | 5.6                         | 3.1                         |
| <b>BP86</b>              |                             |                             |                             |
| $-E$                     | 2507.16515                  | 2393.82034                  | 2393.77049                  |
| $-E_{\text{ZPVE}}$       | 2507.08684                  | 2393.75000                  | 2393.70142                  |
| $\Delta E$               | 0.0                         | 0.0                         | 31.3                        |
| $\Delta E_{\text{ZPVE}}$ | 0.0                         | 0.0                         | 30.5                        |
| $\Delta H$               | 0.0                         | 0.0                         | 30.9                        |
| $\Delta G$               | 0.0                         | 0.0                         | 29.3                        |
| $N_{\text{imag}}$        | none                        | none                        | none                        |
| LUMO-HOMO                | 3.2                         | 3.7                         | 1.3                         |



**Table S46.** Total energies ( $E$  and  $E_{ZPVE}$ , in Hartree), relative energies with and without ZPVE corrections ( $\Delta E$  and  $\Delta E_{ZPVE}$  in kcal/mol),  $\Delta H$  and  $\Delta G$  (in kcal/mol) at the standard condition, the LUMO-HOMO gaps (in eV), spin expectation values ( $S^2$ ), and number of imaginary vibrational frequencies ( $N_{imag}$ ) for three  $(C_5F_6)Fe(CO)_2$  structures.

|                   | <b>12-1S</b> (C <sub>s</sub> ) | <b>12-2T</b> (C <sub>s</sub> )    | <b>12-3S</b> (C <sub>1</sub> ) |
|-------------------|--------------------------------|-----------------------------------|--------------------------------|
| <b>B3LYP</b>      |                                |                                   |                                |
| $-E$              | 2280.16122                     | 2280.16057                        | 2280.12859                     |
| $-E_{ZPVE}$       | 2280.09804                     | 2280.09913                        | 2280.06576                     |
| $\Delta E$        | 0.0                            | 0.4                               | 20.5                           |
| $\Delta E_{ZPVE}$ | 0.0                            | -0.7                              | 20.3                           |
| $\Delta H$        | 0.0                            | -0.2                              | 20.4                           |
| $\Delta G$        | 0.0                            | -1.9                              | 19.7                           |
| $N_{imag}$        | none                           | none                              | none                           |
| $S^2$             | 0.00                           | 2.11                              | 0.00                           |
| LUMO-HOMO         | 3.5                            | ( $\alpha$ )4.4<br>( $\beta$ )3.0 | 3.3                            |
| <b>BP86</b>       |                                |                                   |                                |
| $-E$              | 2280.41320                     | 2280.39229                        | 2280.36973                     |
| $-E_{ZPVE}$       | 2280.35192                     | 2280.33252                        | 2280.30897                     |
| $\Delta E$        | 0.0                            | 13.1                              | 27.3                           |
| $\Delta E_{ZPVE}$ | 0.0                            | 13.0                              | 27.0                           |
| $\Delta H$        | 0.0                            | 12.5                              | 27.1                           |
| $\Delta G$        | 0.0                            | 11.0                              | 26.3                           |
| $N_{imag}$        | none                           | none                              | none                           |
| $S^2$             | 0.00                           | 2.03                              | 0.00                           |
| LUMO-HOMO         | 1.8                            | ( $\alpha$ )2.9<br>( $\beta$ )1.4 | 1.4                            |

**Table S47.** Total energies ( $E$  and  $E_{\text{ZPVE}}$ , in Hartree), relative energies with and without ZPVE corrections ( $\Delta E$  and  $\Delta E_{\text{ZPVE}}$  in kcal/mol),  $\Delta H$  and  $\Delta G$  (in kcal/mol) at the standard condition, the LUMO-HOMO gaps (in eV), and number of imaginary vibrational frequencies ( $N_{\text{imag}}$ ) for two  $(\text{C}_5\text{F}_6)\text{Fe}_2(\text{CO})_8$  structures.

|                          | <b>28-1S(C<sub>2</sub>)</b> | <b>28-2S(C<sub>s</sub>)</b> |
|--------------------------|-----------------------------|-----------------------------|
| <b>B3LYP</b>             |                             |                             |
| $-E$                     | 4224.13944                  | 4224.08009                  |
| $-E_{\text{ZPVE}}$       | 4224.02386                  | 4224.96520                  |
| $\Delta E$               | 0.0                         | 37.2                        |
| $\Delta E_{\text{ZPVE}}$ | 0.0                         | 36.6                        |
| $\Delta H$               | 0.0                         | 36.3                        |
| $\Delta G$               | 0.0                         | 37.4                        |
| $N_{\text{imag}}$        | none                        | 23i                         |
| LUMO-HOMO                | 5.2                         | 4.3                         |
| <b>BP86</b>              |                             |                             |
| $-E$                     | 4224.65150                  | 4224.59677                  |
| $-E_{\text{ZPVE}}$       | 4224.53902                  | 4224.48500                  |
| $\Delta E$               | 0.0                         | 34.3                        |
| $\Delta E_{\text{ZPVE}}$ | 0.0                         | 33.9                        |
| $\Delta H$               | 0.0                         | 33.4                        |
| $\Delta G$               | 0.0                         | 34.5                        |
| $N_{\text{imag}}$        | none                        | 22i                         |
| LUMO-HOMO                | 3.4                         | 2.6                         |

**Table S48.** Total energies ( $E$  and  $E_{\text{ZPVE}}$ , in Hartree), relative energies with and without ZPVE corrections ( $\Delta E$  and  $\Delta E_{\text{ZPVE}}$  in kcal/mol),  $\Delta H$  and  $\Delta G$  (in kcal/mol) at the standard condition, the LUMO-HOMO gaps (in eV), spin expectation values ( $S^2$ ), and number of imaginary vibrational frequencies ( $N_{\text{imag}}$ ) for four  $(\text{C}_5\text{F}_6)\text{Fe}_2(\text{CO})_7$  structures.

|                          | <b>27-1S(C<sub>1</sub>)</b> | <b>27-2S(C<sub>1</sub>)</b> | <b>27-3S(C<sub>s</sub>)</b> | <b>27-4T(C<sub>1</sub>)</b>       |
|--------------------------|-----------------------------|-----------------------------|-----------------------------|-----------------------------------|
| <b>B3LYP</b>             |                             |                             |                             |                                   |
| $-E$                     | 4110.76162                  | 4110.75485                  | 4110.72445                  | 4110.75265                        |
| $-E_{\text{ZPVE}}$       | 4110.65419                  | 4110.64872                  | 4110.61762                  | 4110.64881                        |
| $\Delta E$               | 0.0                         | 4.2                         | 23.3                        | 5.6                               |
| $\Delta E_{\text{ZPVE}}$ | 0.0                         | 3.4                         | 22.9                        | 3.4                               |
| $\Delta H$               | 0.0                         | 3.8                         | 22.4                        | 4.4                               |
| $\Delta G$               | 0.0                         | 1.9                         | 24.4                        | -0.5                              |
| $N_{\text{imag}}$        | none                        | none                        | none                        | none                              |
| $S^2$                    | 0.00                        | 0.00                        | 0.00                        | 2.09                              |
| LUMO-HOMO                | 3.8                         | 3.2                         | 4.1                         | ( $\alpha$ )4.9<br>( $\beta$ )2.6 |
| <b>BP86</b>              |                             |                             |                             |                                   |
| $-E$                     | 4111.27755                  | 4111.25670                  | 4111.25213                  | 4111.24090                        |
| $-E_{\text{ZPVE}}$       | 4111.17315                  | 4111.15351                  | 4111.14814                  | 4111.13917                        |
| $\Delta E$               | 0.0                         | 13.1                        | 16.0                        | 23.0                              |
| $\Delta E_{\text{ZPVE}}$ | 0.0                         | 12.3                        | 15.7                        | 21.3                              |
| $\Delta H$               | 0.0                         | 12.6                        | 15.7                        | 22.1                              |
| $\Delta G$               | 0.0                         | 11.1                        | 16.2                        | 18.3                              |
| $N_{\text{imag}}$        | none                        | none                        | none                        | none                              |
| $S^2$                    | 0.00                        | 0.00                        | 0.00                        | 2.02                              |
| LUMO-HOMO                | 2.4                         | 1.5                         | 2.5                         | ( $\alpha$ )2.7<br>( $\beta$ )1.0 |

**Table S49.** Total energies ( $E$  and  $E_{ZPVE}$ , in Hartree), relative energies with and without ZPVE corrections ( $\Delta E$  and  $\Delta E_{ZPVE}$  in kcal/mol),  $\Delta H$  and  $\Delta G$  (in kcal/mol) at the standard condition, the LUMO-HOMO gaps (in eV), spin expectation values ( $S^2$ ), and number of imaginary vibrational frequencies ( $N_{imag}$ ) for four  $(C_5F_6)Fe_2(CO)_6$  structures.

|                   | <b>26-1S(C<sub>1</sub>)</b> | <b>26-2T(C<sub>1</sub>)</b>       | <b>26-3S(C<sub>2</sub>)</b> | <b>26-4S(C<sub>1</sub>)</b> |
|-------------------|-----------------------------|-----------------------------------|-----------------------------|-----------------------------|
| <b>B3LYP</b>      |                             |                                   |                             |                             |
| $-E$              | 3997.39250                  | 3997.39259                        | 3997.37013                  | 3997.36212                  |
| $-E_{ZPVE}$       | 3997.29464                  | 3997.29635                        | 3997.27351                  | 3997.26454                  |
| $\Delta E$        | 0.0                         | 0.0                               | 14.0                        | 19.0                        |
| $\Delta E_{ZPVE}$ | 0.0                         | -1.0                              | 13.2                        | 18.8                        |
| $\Delta H$        | 0.0                         | -0.6                              | 13.6                        | 18.9                        |
| $\Delta G$        | 0.0                         | -2.4                              | 12.2                        | 18.4                        |
| $N_{imag}$        | none                        | none                              | none                        | none                        |
| $S^2$             | 0.00                        | 2.08                              | 0.00                        | 0.00                        |
| LUMO-HOMO         | 2.8                         | ( $\alpha$ )4.3<br>( $\beta$ )3.0 | 3.2                         | 3.4                         |
| <b>BP86</b>       |                             |                                   |                             |                             |
| $-E$              | 3997.90144                  | 3997.88688                        | 3997.86185                  | 3997.85608                  |
| $-E_{ZPVE}$       | 3997.80640                  | 3997.79328                        | 3997.76797                  | 3997.76115                  |
| $\Delta E$        | 0.0                         | 9.1                               | 24.8                        | 28.5                        |
| $\Delta E_{ZPVE}$ | 0.0                         | 8.2                               | 24.1                        | 28.4                        |
| $\Delta H$        | 0.0                         | 8.6                               | 24.4                        | 28.4                        |
| $\Delta G$        | 0.0                         | 7.0                               | 22.9                        | 27.7                        |
| $N_{imag}$        | none                        | none                              | none                        | none                        |
| $S^2$             | 0.00                        | 2.02                              | 0.00                        | 0.00                        |
| LUMO-HOMO         | 1.3                         | ( $\alpha$ )2.3<br>( $\beta$ )1.1 | 1.4                         | 1.4                         |

**Table S50.** Total energies ( $E$  and  $E_{ZPVE}$ , in Hartree), relative energies with and without ZPVE corrections ( $\Delta E$  and  $\Delta E_{ZPVE}$  in kcal/mol),  $\Delta H$  and  $\Delta G$  (in kcal/mol) at the standard condition, the LUMO-HOMO gaps (in eV), spin expectation values ( $S^2$ ), and number of imaginary vibrational frequencies ( $N_{imag}$ ) for the six  $(C_5F_6)Fe_2(CO)_5$  structures.

|                   | 25-1S(C <sub>1</sub> ) | 25-2S(C <sub>1</sub> ) | 25-3T(C <sub>1</sub> )            | 25-4S(C <sub>1</sub> ) | 25-5S(C <sub>s</sub> ) | 25-6T(C <sub>1</sub> )            |
|-------------------|------------------------|------------------------|-----------------------------------|------------------------|------------------------|-----------------------------------|
| <b>B3LYP</b>      |                        |                        |                                   |                        |                        |                                   |
| $-E$              | 3884.02356             | 3884.00756             | 3884.01961                        | 3883.99459             | 3883.98821             | 3884.00302                        |
| $-E_{ZPVE}$       | 3883.93400             | 3883.91861             | 3883.93206                        | 3883.90599             | 3883.90000             | 3883.91654                        |
| $\Delta E$        | 0.0                    | 10.0                   | 2.5                               | 18.2                   | 22.2                   | 12.9                              |
| $\Delta E_{ZPVE}$ | 0.0                    | 9.7                    | 1.2                               | 17.6                   | 21.3                   | 11.0                              |
| $\Delta H$        | 0.0                    | 9.8                    | 1.7                               | 17.8                   | 21.1                   | 11.9                              |
| $\Delta G$        | 0.0                    | 9.5                    | 0.1                               | 17.3                   | 21.9                   | 6.7                               |
| $N_{imag}$        | none                   | none                   | none                              | none                   | 1(47i)                 | none                              |
| $S^2$             | 0.00                   | 0.00                   | 2.10                              | 0.00                   | 0.00                   | 2.11                              |
| LUMO-HOMO         | 3.5                    | 3.1                    | ( $\alpha$ )3.6<br>( $\beta$ )3.3 | 2.3                    | 2.4                    | ( $\alpha$ )3.1<br>( $\beta$ )2.6 |
| <b>BP86</b>       |                        |                        |                                   |                        |                        |                                   |
| $-E$              | 3884.52699             | 3884.51377             | 3884.50768                        | 3884.50067             | 3884.49755             | 3884.46313                        |
| $-E_{ZPVE}$       | 3884.44017             | 3884.42740             | 3884.42270                        | 3884.41481             | 3884.41210             | 3884.37913                        |
| $\Delta E$        | 0.0                    | 8.3                    | 12.1                              | 16.5                   | 18.5                   | 40.1                              |
| $\Delta E_{ZPVE}$ | 0.0                    | 8.0                    | 10.9                              | 15.9                   | 17.6                   | 38.3                              |
| $\Delta H$        | 0.0                    | 8.2                    | 11.4                              | 16.2                   | 17.4                   | 39.2                              |
| $\Delta G$        | 0.0                    | 7.8                    | 9.7                               | 15.5                   | 18.1                   | 34.7                              |
| $N_{imag}$        | none                   | none                   | none                              | none                   | 1(33i)                 | none                              |
| $S^2$             | 0.00                   | 0.00                   | 2.04                              | 0.00                   | 0.00                   | 2.04                              |
| LUMO-HOMO         | 1.7                    | 1.4                    | ( $\alpha$ )1.7<br>( $\beta$ )1.2 | 0.9                    | 0.9                    | ( $\alpha$ )0.8<br>( $\beta$ )0.7 |

**Table S51.** The  $\nu(\text{CO})$  frequencies of the mononuclear  $(\text{C}_5\text{F}_6)\text{Fe}(\text{CO})_n$  ( $n = 4, 3, 2$ ) and binuclear  $(\text{C}_5\text{F}_6)\text{Fe}_2(\text{CO})_n$  ( $n = 8, 7, 6, 5$ ) derivatives (with the BP86 method). Infrared intensities are given in parentheses in km/mol.

| Structures                                                        | $\nu(\text{CO})$                                                                         |
|-------------------------------------------------------------------|------------------------------------------------------------------------------------------|
| $(\text{C}_5\text{F}_6)\text{Fe}(\text{CO})_4$ ( <b>14-1S</b> )   | 2088(262), 2028(464), 2019(816), 2007(881)                                               |
| $(\text{C}_5\text{F}_6)\text{Fe}(\text{CO})_3$ ( <b>13-1S</b> )   | 2057(530), 2009(716), 2000(679)                                                          |
| $(\text{C}_5\text{F}_6)\text{Fe}(\text{CO})_3$ ( <b>13-2S</b> )   | 2052(442), 1996(842), 1991(611)                                                          |
| $(\text{C}_5\text{F}_6)\text{Fe}(\text{CO})_2$ ( <b>12-1S</b> )   | 2022(722), 1979(790)                                                                     |
| $(\text{C}_5\text{F}_6)\text{Fe}(\text{CO})_2$ ( <b>12-2T</b> )   | 2022(721), 1980(978)                                                                     |
| $(\text{C}_5\text{F}_6)\text{Fe}(\text{CO})_2$ ( <b>12-3S</b> )   | 2011(556), 1962(745)                                                                     |
| $(\text{C}_5\text{F}_6)\text{Fe}_2(\text{CO})_8$ ( <b>28-1S</b> ) | 2093(20), 2080(788), 2026(1426), 2026(5), 2022(1017),<br>2018(163), 2008(1529), 2005(82) |
| $(\text{C}_5\text{F}_6)\text{Fe}_2(\text{CO})_8$ ( <b>28-2S</b> ) | 2088(117), 2071(990), 2025(863), 2020(800), 2020(6),<br>2006(1172), 1999(282), 1994(478) |
| $(\text{C}_5\text{F}_6)\text{Fe}_2(\text{CO})_7$ ( <b>27-1S</b> ) | 2080(423), 2032(1567), 2021(184), 2011(1292), 2009(478),<br>1988(50), 1969(126)          |
| $(\text{C}_5\text{F}_6)\text{Fe}_2(\text{CO})_7$ ( <b>27-2S</b> ) | 2087(269), 2050(712), 2026(533), 2020(882), 2007(1005),<br>1994(631), 1993(498)          |
| $(\text{C}_5\text{F}_6)\text{Fe}_2(\text{CO})_7$ ( <b>27-3S</b> ) | 2067(424), 2034(1526), 2021(1030), 2006(647), 2002(8),<br>1993(83), <b>1835(378)</b>     |
| $(\text{C}_5\text{F}_6)\text{Fe}_2(\text{CO})_7$ ( <b>27-4T</b> ) | 2088(365), 2029(287), 2024(918), 2019(1073), 2009(857),<br>1984(574), 1971(889)          |
| $(\text{C}_5\text{F}_6)\text{Fe}_2(\text{CO})_6$ ( <b>26-1S</b> ) | 2065(444), 2029(1540), 2008(804), 2006(518), 1983(80),<br>1967(353)                      |
| $(\text{C}_5\text{F}_6)\text{Fe}_2(\text{CO})_6$ ( <b>26-2T</b> ) | 2045(376), 2016(1447), 1990(866), 1985(793), 1972(5),<br>1956(283)                       |
| $(\text{C}_5\text{F}_6)\text{Fe}_2(\text{CO})_6$ ( <b>26-3S</b> ) | 2055(428), 2021(1735), 2002(1152), 1993(533), 1986(130),<br>1964(3),                     |
| $(\text{C}_5\text{F}_6)\text{Fe}_2(\text{CO})_6$ ( <b>26-4S</b> ) | 2056(13), 2045(1215), 1995(1466), 1994(955), 1992(256),<br>1991(111)                     |
| $(\text{C}_5\text{F}_6)\text{Fe}_2(\text{CO})_5$ ( <b>25-1S</b> ) | 2044(345), 2017(1547), 2005(694), 1982(489), 1915(408)                                   |
| $(\text{C}_5\text{F}_6)\text{Fe}_2(\text{CO})_5$ ( <b>25-2S</b> ) | 2047(427), 2015(1415), 1997(990), 1985(204), 1967(437)                                   |
| $(\text{C}_5\text{F}_6)\text{Fe}_2(\text{CO})_5$ ( <b>25-3T</b> ) | 2044(438), 2012(1564), 1998(1207), 1985(55), <b>1893(361)</b>                            |
| $(\text{C}_5\text{F}_6)\text{Fe}_2(\text{CO})_5$ ( <b>25-4S</b> ) | 2039(501), 2002(1819), 1988(1091), 1968(17), <b>1833(242)</b>                            |
| $(\text{C}_5\text{F}_6)\text{Fe}_2(\text{CO})_5$ ( <b>25-5S</b> ) | 2039(449), 2010(1619), 1989(1193), 1964(80), <b>1821(252)</b>                            |
| $(\text{C}_5\text{F}_6)\text{Fe}_2(\text{CO})_5$ ( <b>25-6T</b> ) | 2052(361), 2010(1624), 1995(798), 1992(650), 1964(1021)                                  |

**Bold face means bridging CO groups.**

### Complete Gaussian 03 reference (Reference 28)

Frisch, M. J.; Trucks, G. W.; Schlegel, H. B.; Scuseria, G. E.; Robb, M. A.; Cheeseman, J. R.; Montgomery, Jr., J. A.; Vreven, T.; Kudin, K. N.; Burant, J. C.; Millam, J. M.; Iyengar, S. S.; Tomasi, J.; Barone, V.; Mennucci, B.; Cossi, M.; Scalmani, G.; Rega, N.; Petersson, G. A.; Nakatsuji, H.; Hada, M.; Ehara, M.; Toyota, K.; Fukuda, R.; Hasegawa, J.; Ishida, M.; Nakajima, T.; Honda, Y.; Kitao, O.; Nakai, H.; Klene, M.; Li, X.; Knox, J. E.; Hratchian, H. P.; Cross, J. B.; Bakken, V.; Adamo, C.; Jaramillo, J.; Gomperts, R.; Stratmann, R. E.; Yazyev, O.; Austin, A. J.; Cammi, R.; Pomelli, C.; Ochterski, J. W.; Ayala, P. Y.; Morokuma, K.; Voth, G. A.; Salvador, P.; Dannenberg, J. J.; Zakrzewski, V. G.; Dapprich, S.; Daniels, A. D.; Strain, M. C.; Farkas, O.; Malick, D. K.; Rabuck, A. D.; Raghavachari, K.; Foresman, J. B.; Ortiz, J. V.; Cui, Q.; Baboul, A. G.; Clifford, S.; Cioslowski, J.; Stefanov, B. B.; Liu, G.; Liashenko, A.; Piskorz, P.; Komaromi, I.; Martin, R. L.; Fox, D. J.; Keith, T.; Al-Laham, M. A.; Peng, C. Y.; Nanayakkara, A.; Challacombe, M.; Gill, P. M. W.; Johnson, B.; Chen, W.; Wong, M. W.; Gonzalez, C.; and Pople, J. A. Gaussian 03, Revision C.02; Gaussian, Inc., Wallingford CT, **2004**.
